# Supplementary material for: Stereochemical investigations of bioactive dihydrobenzofuran-type lignanamides from Solanum lyratum: chiral resolution, in vitro and in silico profiling
Source: Royal Society of Chemistry journal article supplement (doi:10.1039/d3nj02478d), 2023-01-01
Supplement: d3nj02478d1.pdf [file d3nj02478d1.pdf]

## **Stereochemical insights into neuroprotective lignanamides from the herbs of *Solanum lyratum***

Ye Chang<sup>a, 1</sup>, Zhi-Kang Duan<sup>a, 1</sup>, Xin Zhang<sup>a</sup>, Jiao-Yang Hou<sup>a</sup>, Jia-Qi Niu<sup>a</sup>, Guo-Dong Yao<sup>a</sup>, Bin Lin<sup>b</sup>, Shao-Jiang Song<sup>a</sup>, Ming Bai<sup>a, \*</sup>, Xiao-Xiao Huang<sup>a, \*</sup>

<sup>a</sup> *Key Laboratory of Computational Chemistry-Based Natural Antitumor Drug Research & Development, Liaoning Province; Engineering Research Center of Natural Medicine Active Molecule Research & Development, Liaoning Province; Key Laboratory of Natural Bioactive Compounds Discovery & Modification, Shenyang; School of Traditional Chinese Materia Medica, Shenyang Pharmaceutical University, Shenyang, 110016, People's Republic of China*

<sup>b</sup> *School of Pharmaceutical Engineering, Shenyang Pharmaceutical University, Shenyang 110016, People's Republic of China*

<sup>1</sup> The two authors contributed equally to this work

\*Corresponding authors.

Ming Bai, [baiming1990@163.com](mailto:baiming1990@163.com)

Xiao-Xiao Huang, [xiaoxiao270@163.com](mailto:xiaoxiao270@163.com)

|                                                                                                                          |    |
|--------------------------------------------------------------------------------------------------------------------------|----|
| <b>Fig. S1.</b> The $^1\text{H}$ NMR (600 MHz, $\text{DMSO-}d_6$ ) spectrum of compounds <b>1a/1b</b> .....              | 1  |
| <b>Fig. S2.</b> The $^{13}\text{C}$ NMR (150 MHz, $\text{DMSO-}d_6$ ) spectrum of compounds <b>1a/1b</b> .....           | 1  |
| <b>Fig. S3.</b> The HSQC (600 MHz, $\text{DMSO-}d_6$ ) spectrum of compounds <b>1a/1b</b> .....                          | 2  |
| <b>Fig. S4.</b> The HMBC (600 MHz, $\text{DMSO-}d_6$ ) spectrum of compounds <b>1a/1b</b> .....                          | 2  |
| <b>Fig. S5.</b> The $^1\text{H-}^1\text{H}$ COSY (600 MHz, $\text{DMSO-}d_6$ ) spectrum of compounds <b>1a/1b</b> .....  | 3  |
| <b>Fig. S6.</b> The HRESIMS spectrum of compounds <b>1a/1b</b> .....                                                     | 3  |
| <b>Fig. S7.</b> The UV spectrum of compounds <b>1a/1b</b> .....                                                          | 4  |
| <b>Fig. S8.</b> The $^1\text{H}$ NMR (600 MHz, $\text{DMSO-}d_6$ ) spectrum of compounds <b>2a/2b</b> .....              | 4  |
| <b>Fig. S9.</b> The $^{13}\text{C}$ NMR (150 MHz, $\text{DMSO-}d_6$ ) spectrum of compounds <b>2a/2b</b> .....           | 5  |
| <b>Fig. S10.</b> The HSQC (600 MHz, $\text{DMSO-}d_6$ ) spectrum of compounds <b>2a/2b</b> .....                         | 5  |
| <b>Fig. S11.</b> The HMBC (600 MHz, $\text{DMSO-}d_6$ ) spectrum of compounds <b>2a/2b</b> .....                         | 6  |
| <b>Fig. S12.</b> The $^1\text{H-}^1\text{H}$ COSY (600 MHz, $\text{DMSO-}d_6$ ) spectrum of compounds <b>2a/2b</b> ..... | 6  |
| <b>Fig. S13.</b> The HRESIMS spectrum of compounds <b>2a/2b</b> .....                                                    | 7  |
| <b>Fig. S14.</b> The UV spectrum of compounds <b>2a/2b</b> .....                                                         | 7  |
| <b>Fig. S15.</b> The $^1\text{H}$ NMR (600 MHz, $\text{DMSO-}d_6$ ) spectrum of compounds <b>3a/3b</b> .....             | 8  |
| <b>Fig. S16.</b> The $^{13}\text{C}$ NMR (150 MHz, $\text{DMSO-}d_6$ ) spectrum of compounds <b>3a/3b</b> .....          | 8  |
| <b>Fig. S17.</b> The HSQC (600 MHz, $\text{DMSO-}d_6$ ) spectrum of compounds <b>3a/3b</b> .....                         | 9  |
| <b>Fig. S18.</b> The HMBC (600 MHz, $\text{DMSO-}d_6$ ) spectrum of compounds <b>3a/3b</b> .....                         | 9  |
| <b>Fig. S19.</b> The $^1\text{H-}^1\text{H}$ COSY (600 MHz, $\text{DMSO-}d_6$ ) spectrum of compounds <b>3a/3b</b> ..    | 10 |
| <b>Fig. S20.</b> The HRESIMS spectrum of compounds <b>3a/3b</b> .....                                                    | 10 |
| <b>Fig. S21.</b> The UV spectrum of compounds <b>3a/3b</b> .....                                                         | 11 |
| <b>Fig. S22.</b> The $^1\text{H}$ NMR (600 MHz, $\text{DMSO-}d_6$ ) spectrum of compounds <b>4a/4b</b> .....             | 11 |
| <b>Fig. S23.</b> The $^{13}\text{C}$ NMR (150 MHz, $\text{DMSO-}d_6$ ) spectrum of compounds <b>4a/4b</b> .....          | 12 |
| <b>Fig. S24.</b> The HSQC (600 MHz, $\text{DMSO-}d_6$ ) spectrum of compounds <b>4a/4b</b> .....                         | 12 |
| <b>Fig. S25.</b> The HMBC (600 MHz, $\text{DMSO-}d_6$ ) spectrum of compounds <b>4a/4b</b> .....                         | 13 |
| <b>Fig. S26.</b> The $^1\text{H-}^1\text{H}$ COSY (600 MHz, $\text{DMSO-}d_6$ ) spectrum of compounds <b>4a/4b</b> ..    | 13 |
| <b>Fig. S27.</b> The HRESIMS spectrum of compounds <b>4a/4b</b> .....                                                    | 14 |
| <b>Fig. S28.</b> The UV spectrum of compounds <b>4a/4b</b> .....                                                         | 14 |
| <b>Fig. S29.</b> The $^1\text{H}$ NMR (600 MHz, $\text{DMSO-}d_6$ ) spectrum of compounds <b>5a/5b</b> .....             | 15 |
| <b>Fig. S30.</b> The $^{13}\text{C}$ NMR (150 MHz, $\text{DMSO-}d_6$ ) spectrum of compounds <b>5a/5b</b> .....          | 15 |
| <b>Fig. S31.</b> The HSQC (600 MHz, $\text{DMSO-}d_6$ ) spectrum of compounds <b>5a/5b</b> .....                         | 16 |
| <b>Fig. S32.</b> The HMBC (600 MHz, $\text{DMSO-}d_6$ ) spectrum of compounds <b>5a/5b</b> .....                         | 16 |
| <b>Fig. S33.</b> The $^1\text{H-}^1\text{H}$ COSY (600 MHz, $\text{DMSO-}d_6$ ) spectrum of compounds <b>5a/5b</b> ..    | 17 |
| <b>Fig. S34.</b> The HRESIMS spectrum of compounds <b>5a/5b</b> .....                                                    | 17 |
| <b>Fig. S35.</b> The UV spectrum of compounds <b>5a/5b</b> .....                                                         | 18 |
| <b>Fig. S36.</b> The $^1\text{H}$ NMR (600 MHz, $\text{DMSO-}d_6$ ) spectrum of compounds <b>6a/6b</b> .....             | 18 |
| <b>Fig. S37.</b> The $^{13}\text{C}$ NMR (150 MHz, $\text{DMSO-}d_6$ ) spectrum of compounds <b>6a/6b</b> .....          | 19 |
| <b>Fig. S38.</b> The HSQC (600 MHz, $\text{DMSO-}d_6$ ) spectrum of compounds <b>6a/6b</b> .....                         | 19 |
| <b>Fig. S39.</b> The HMBC (600 MHz, $\text{DMSO-}d_6$ ) spectrum of compounds <b>6a/6b</b> .....                         | 20 |
| <b>Fig. S40.</b> The $^1\text{H-}^1\text{H}$ COSY (600 MHz, $\text{DMSO-}d_6$ ) spectrum of compounds <b>6a/6b</b> ..    | 20 |
| <b>Fig. S41.</b> The HRESIMS spectrum of compounds <b>6a/6b</b> .....                                                    | 21 |
| <b>Fig. S42.</b> The UV spectrum of compounds <b>6a/6b</b> .....                                                         | 21 |
| <b>Fig. S43.</b> The $^1\text{H}$ NMR (600 MHz, $\text{DMSO-}d_6$ ) spectrum of compound <b>7</b> .....                  | 22 |
| <b>Fig. S44.</b> The $^{13}\text{C}$ NMR (150 MHz, $\text{DMSO-}d_6$ ) spectrum of compound <b>7</b> .....               | 22 |

|                                                                                                                                      |    |
|--------------------------------------------------------------------------------------------------------------------------------------|----|
| <b>Fig. S45.</b> The HSQC (600 MHz, DMSO- <i>d</i> <sub>6</sub> ) spectrum of compound <b>7</b> .....                                | 23 |
| <b>Fig. S46.</b> The HMBC (600 MHz, DMSO- <i>d</i> <sub>6</sub> ) spectrum of compound <b>7</b> .....                                | 23 |
| <b>Fig. S47.</b> The <sup>1</sup> H- <sup>1</sup> H COSY (600 MHz, DMSO- <i>d</i> <sub>6</sub> ) spectrum of compound <b>7</b> ..... | 24 |
| <b>Fig. S48.</b> The HRESIMS spectrum of compound <b>7</b> .....                                                                     | 24 |
| <b>Fig. S49.</b> The UV spectrum of compound <b>7</b> .....                                                                          | 25 |
| <b>Table S1.</b> Inhibitory activities of AChE by compounds from <i>S. lyratum</i> .....                                             | 25 |

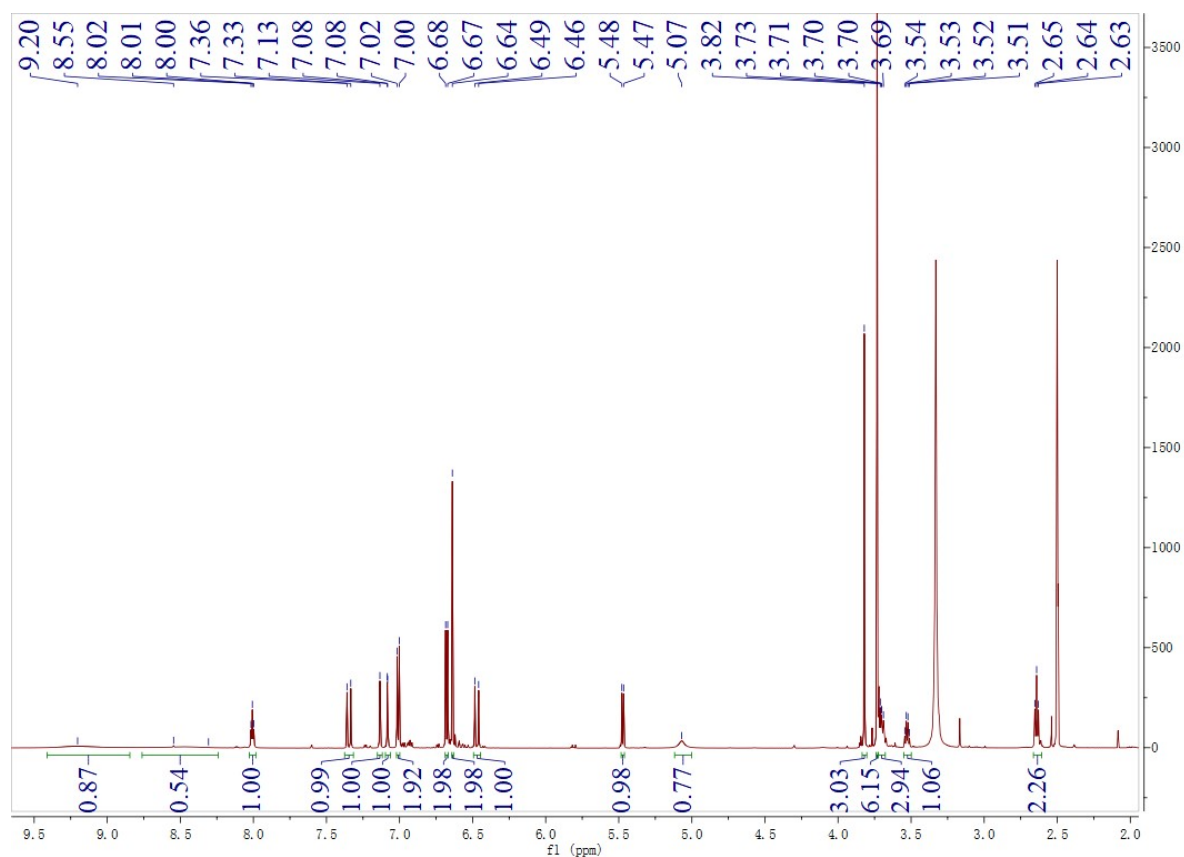

**Fig. S1.** The  $^1\text{H}$  NMR (600 MHz,  $\text{DMSO-}d_6$ ) spectrum of compounds **1a/1b**

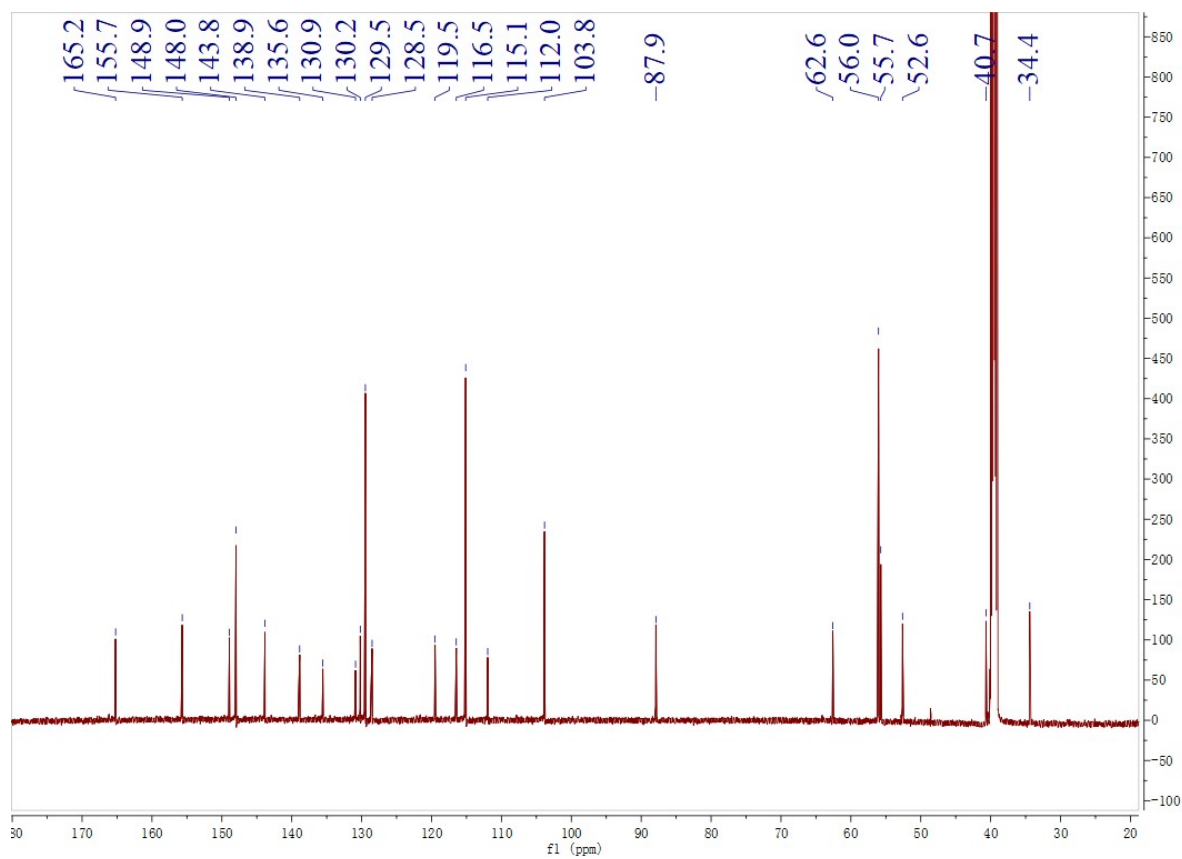

**Fig. S2.** The  $^{13}\text{C}$  NMR (150 MHz,  $\text{DMSO-}d_6$ ) spectrum of compounds **1a/1b**

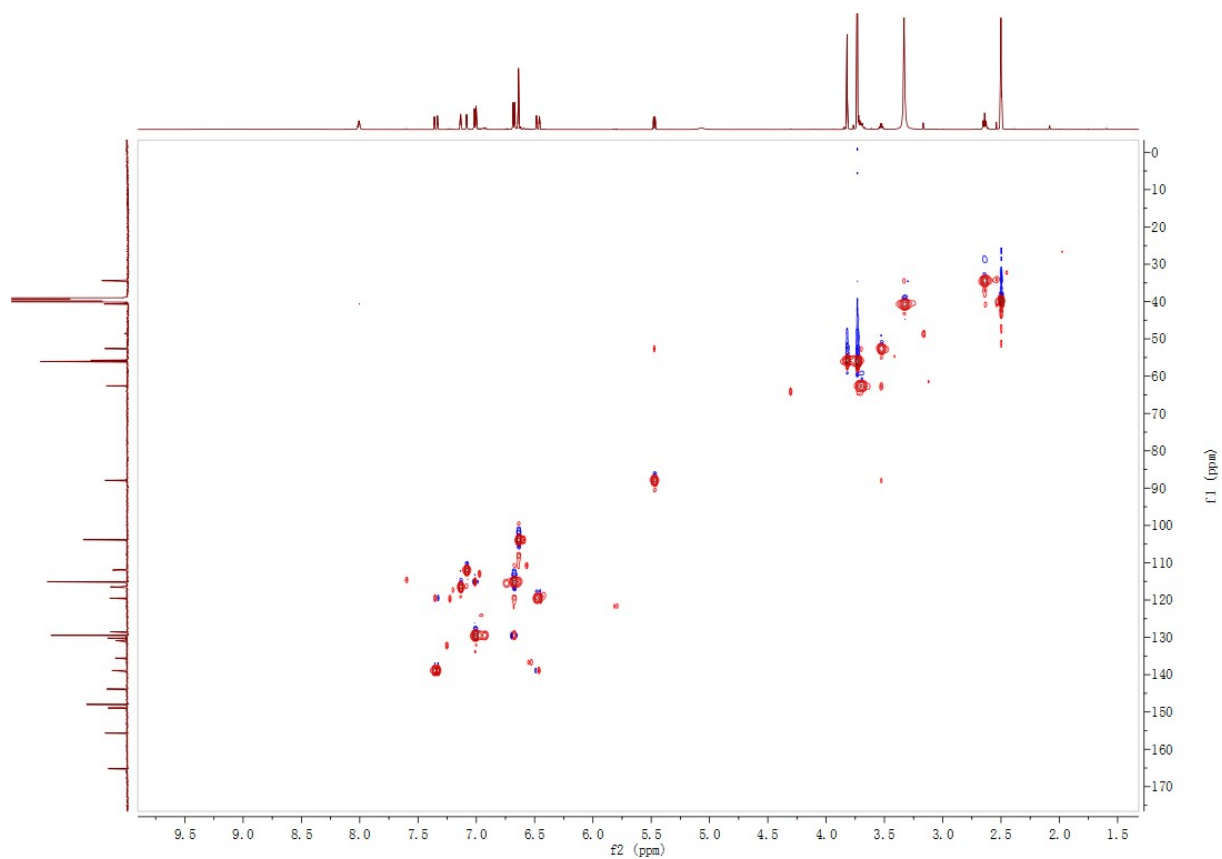

**Fig. S3.** The HSQC (600 MHz, DMSO-*d*<sub>6</sub>) spectrum of compounds **1a/1b**

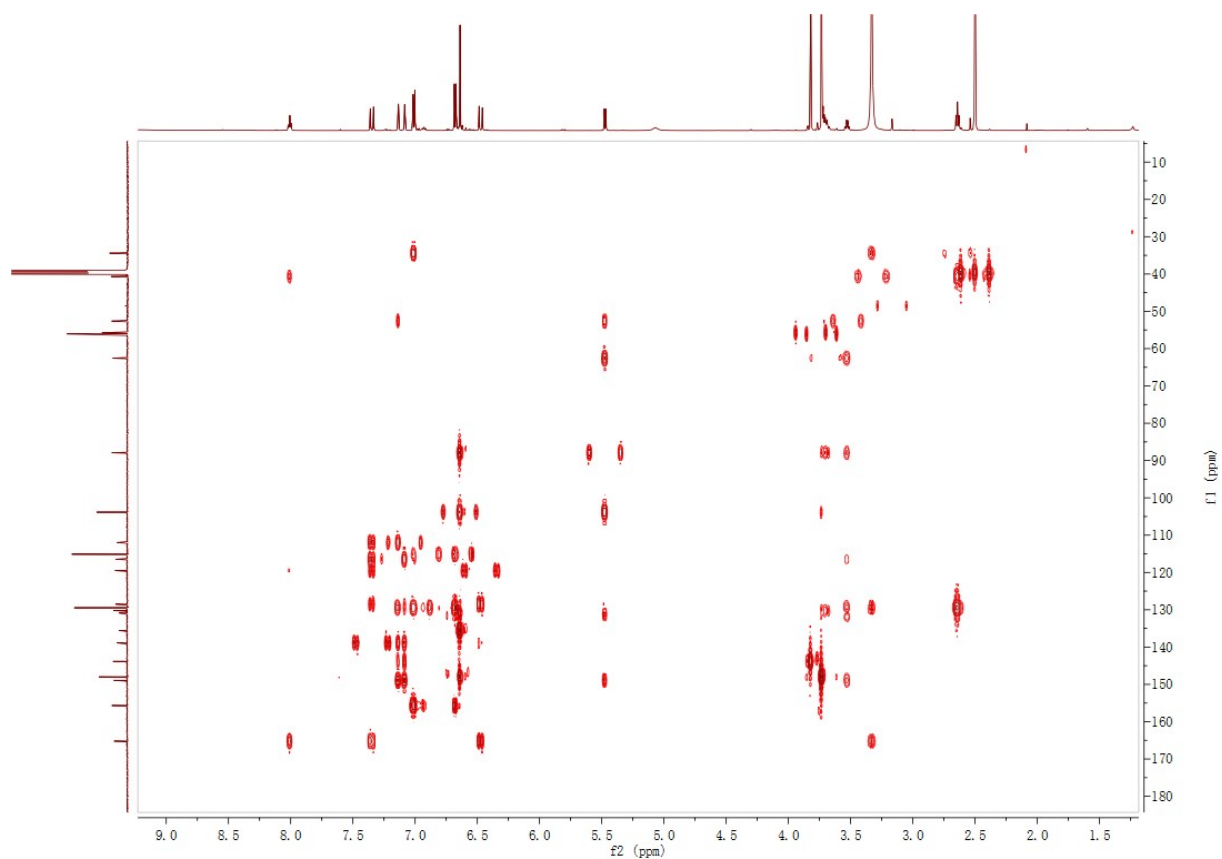

**Fig. S4.** The HMBC (600 MHz, DMSO-*d*<sub>6</sub>) spectrum of compounds **1a/1b**

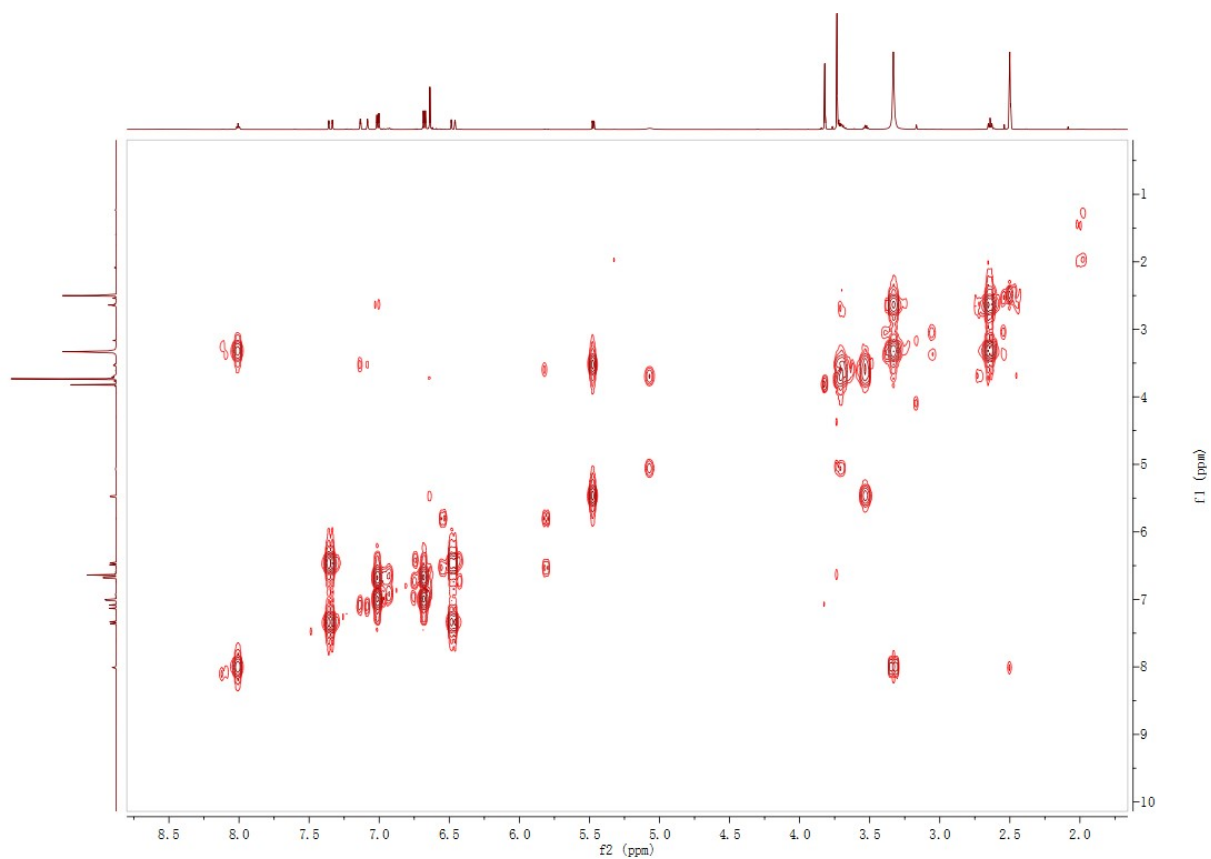

**Fig. S5.** The  $^1\text{H}$ - $^1\text{H}$  COSY (600 MHz,  $\text{DMSO-}d_6$ ) spectrum of compounds **1a/1b**

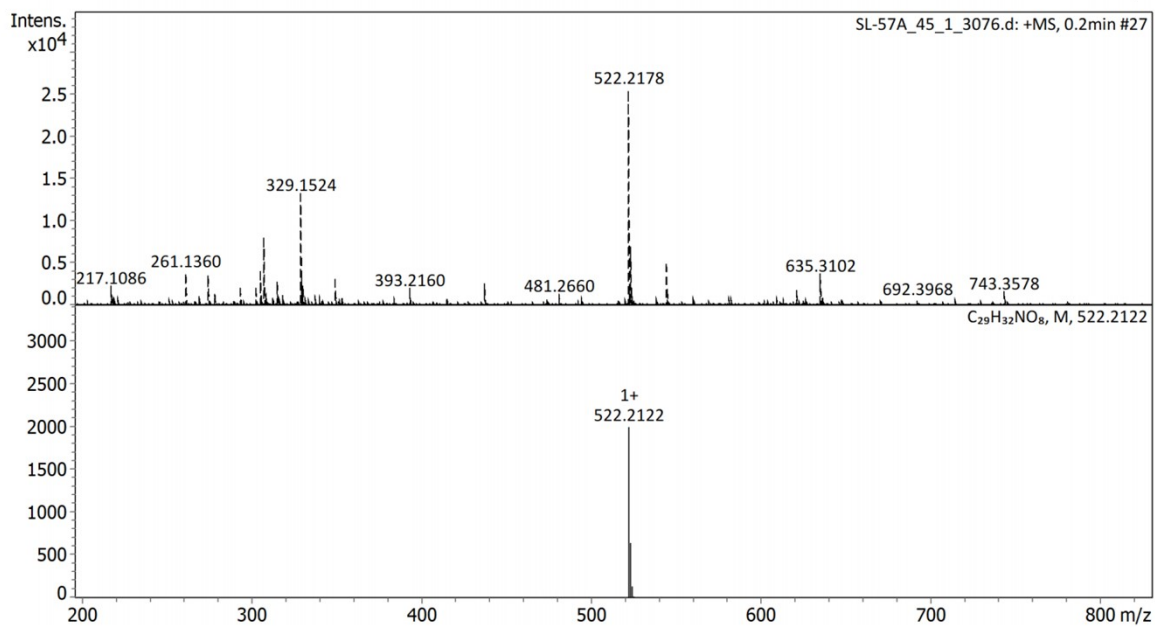

**Fig. S6.** The HRESIMS spectrum of compounds **1a/1b**

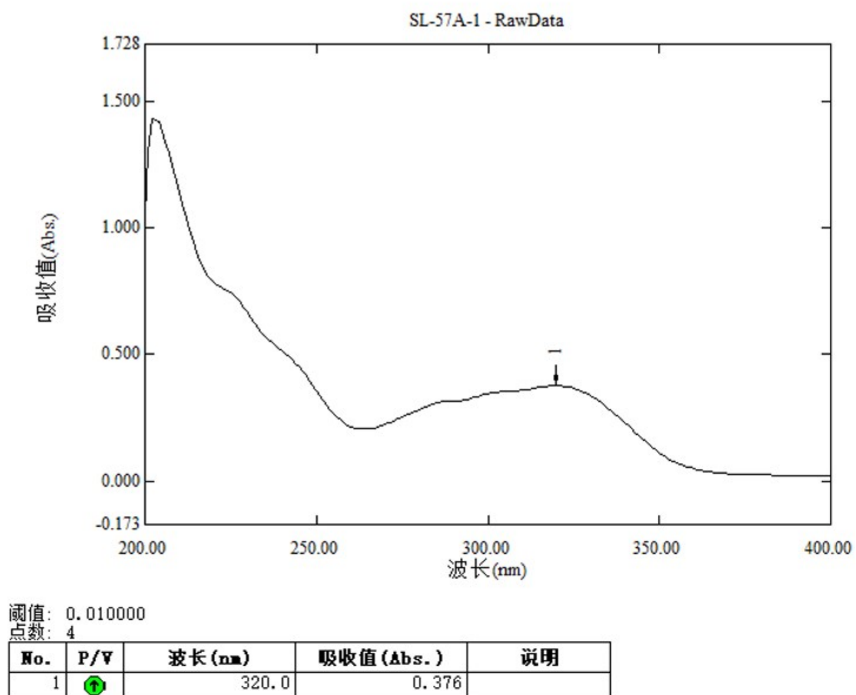

**Fig. S7.** The UV spectrum of compounds **1a/1b**

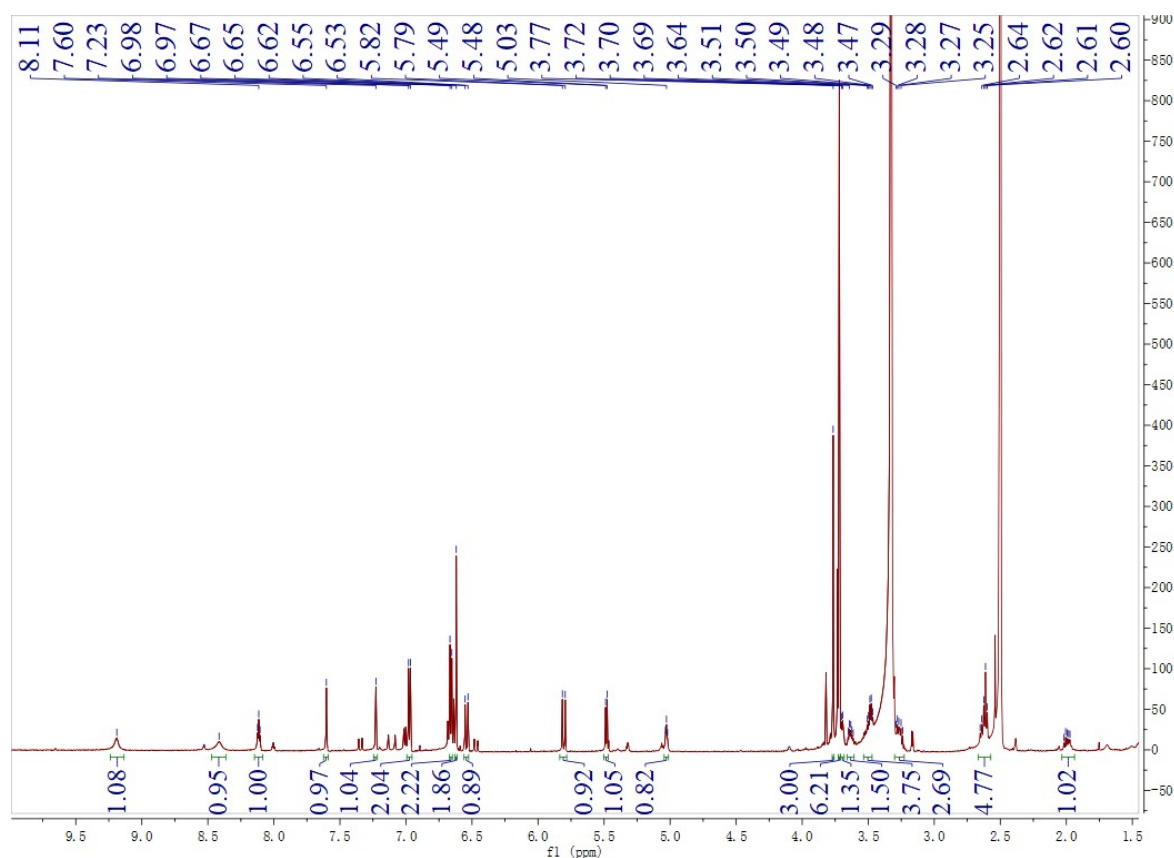

**Fig. S8.** The  $^1\text{H}$  NMR (600 MHz,  $\text{DMSO-}d_6$ ) spectrum of compounds **2a/2b**

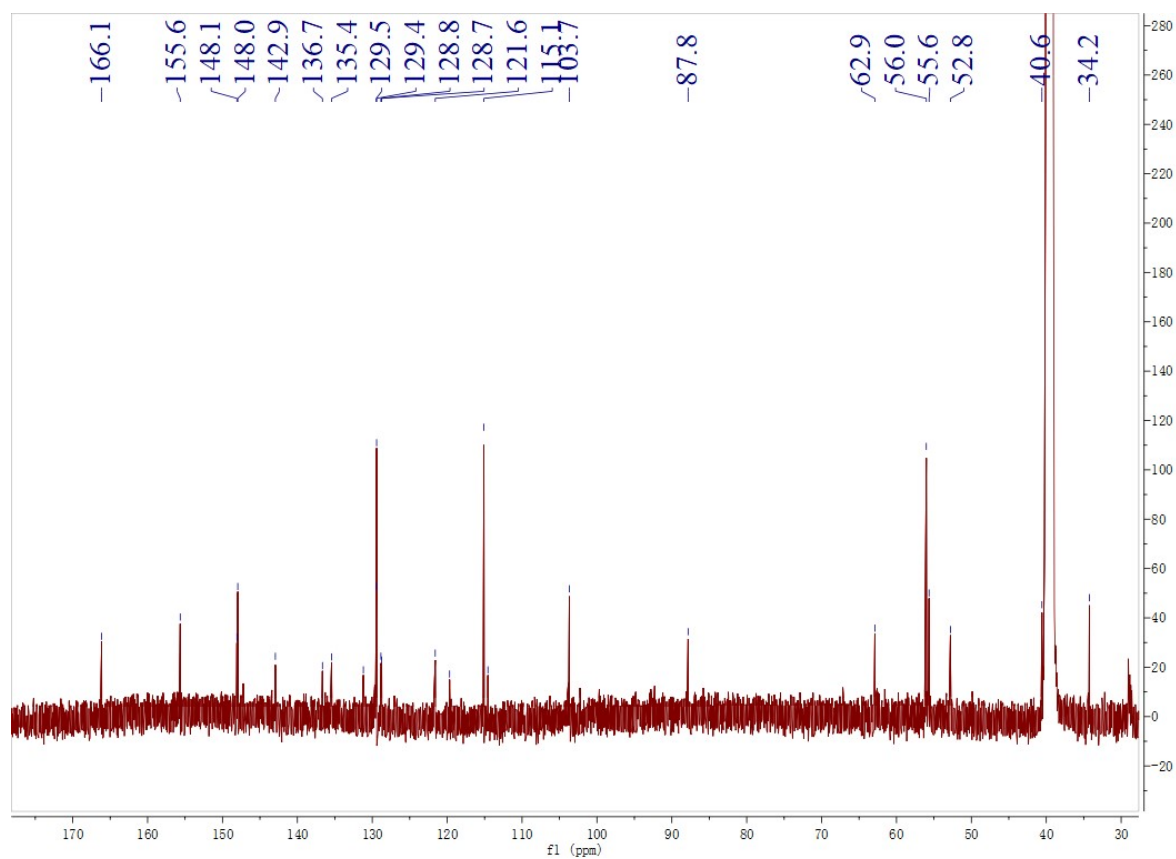

**Fig. S9.** The  $^{13}\text{C}$  NMR (150 MHz,  $\text{DMSO-}d_6$ ) spectrum of compounds **2a/2b**

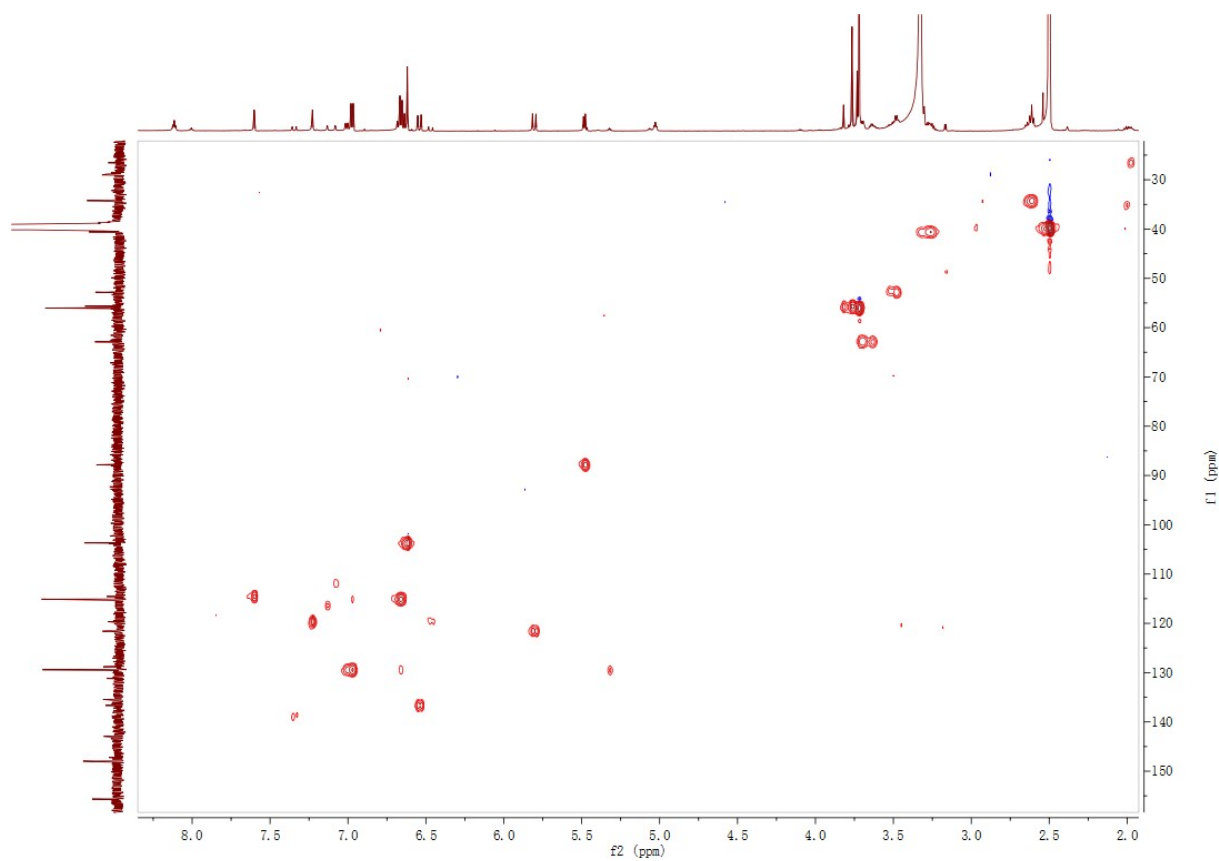

**Fig. S10.** The HSQC (600 MHz,  $\text{DMSO-}d_6$ ) spectrum of compounds **2a/2b**



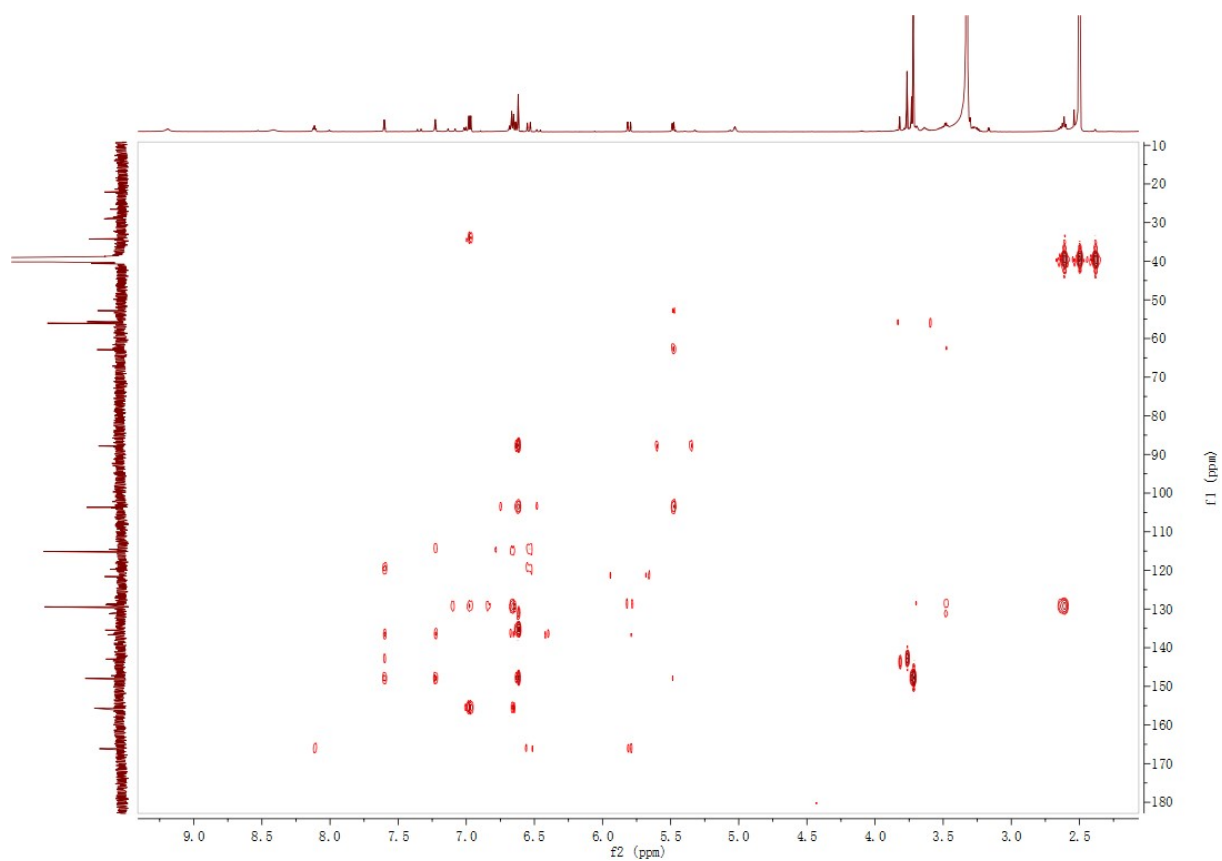

**Fig. S11.** The HMBC (600 MHz, DMSO- $d_6$ ) spectrum of compounds **2a/2b**

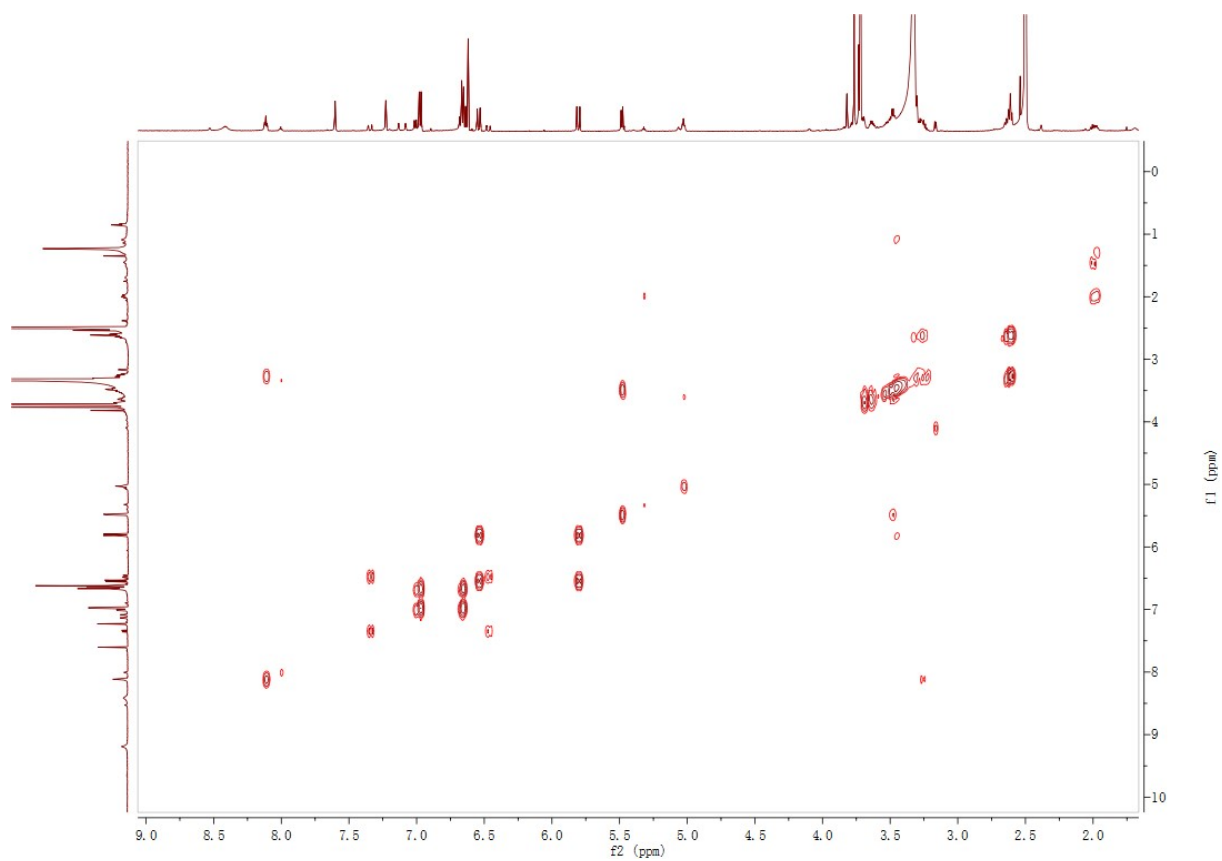

**Fig. S12.** The  $^1\text{H}$ - $^1\text{H}$  COSY (600 MHz, DMSO- $d_6$ ) spectrum of compounds **2a/2b**

**Acquisition Parameter**

|             |            |                       |           |                  |           |
|-------------|------------|-----------------------|-----------|------------------|-----------|
| Source Type | ESI        | Ion Polarity          | Positive  | Set Nebulizer    | 1.2 Bar   |
| Focus       | Not active | Set Capillary         | 4500 V    | Set Dry Heater   | 180 °C    |
| Scan Begin  | 100 m/z    | Set End Plate Offset  | -500 V    | Set Dry Gas      | 8.0 l/min |
| Scan End    | 1500 m/z   | Set Collision Cell RF | 400.0 Vpp | Set Divert Valve | Source    |

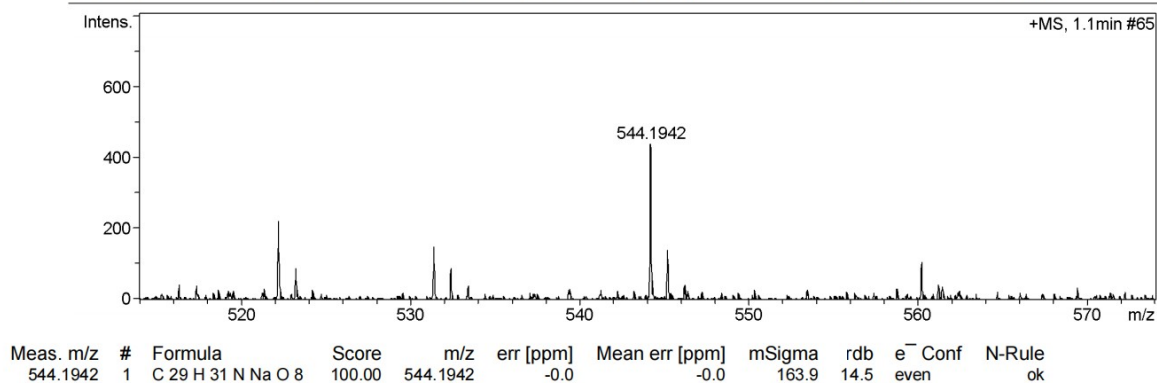**Fig. S13.** The HRESIMS spectrum of compounds **2a/2b**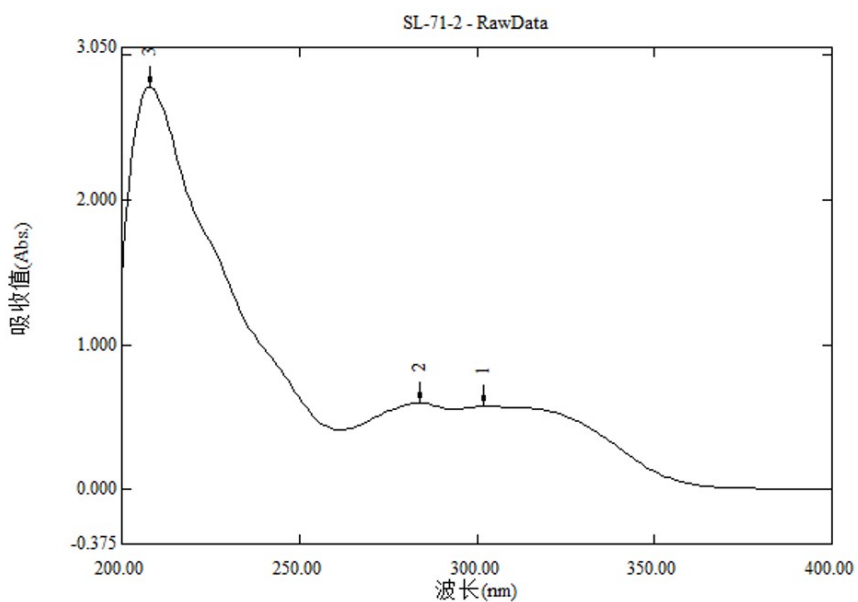

閾值: 0.010000  
 点数: 4

| No. | P/V | 波长 (nm) | 吸收值 (Abs.) | 说明 |
|-----|-----|---------|------------|----|
| 1   | ⊕   | 302.0   | 0.574      |    |
| 2   | ⊕   | 284.0   | 0.597      |    |
| 3   | ⊕   | 208.0   | 2.777      |    |

**Fig. S14.** The UV spectrum of compounds **2a/2b**

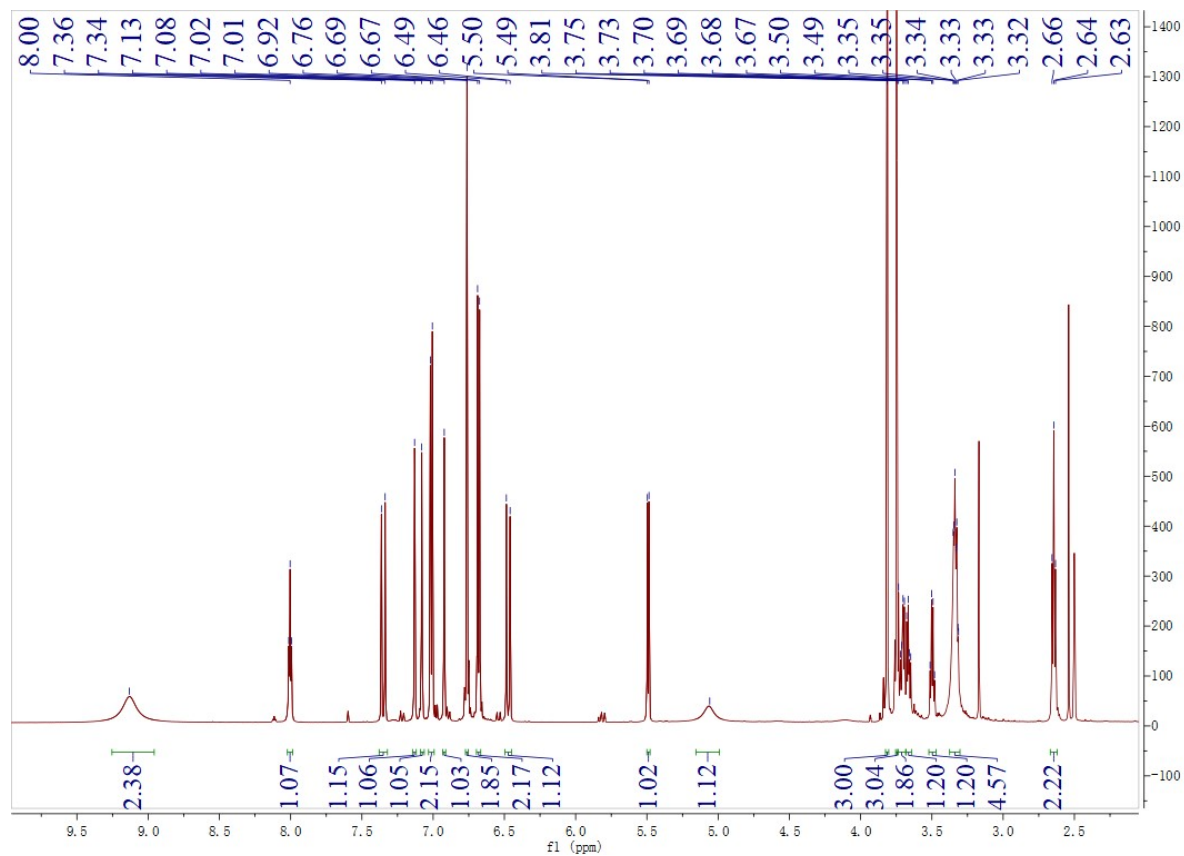

**Fig. S15.** The  $^1\text{H}$  NMR (600 MHz,  $\text{DMSO-}d_6$ ) spectrum of compounds **3a/3b**

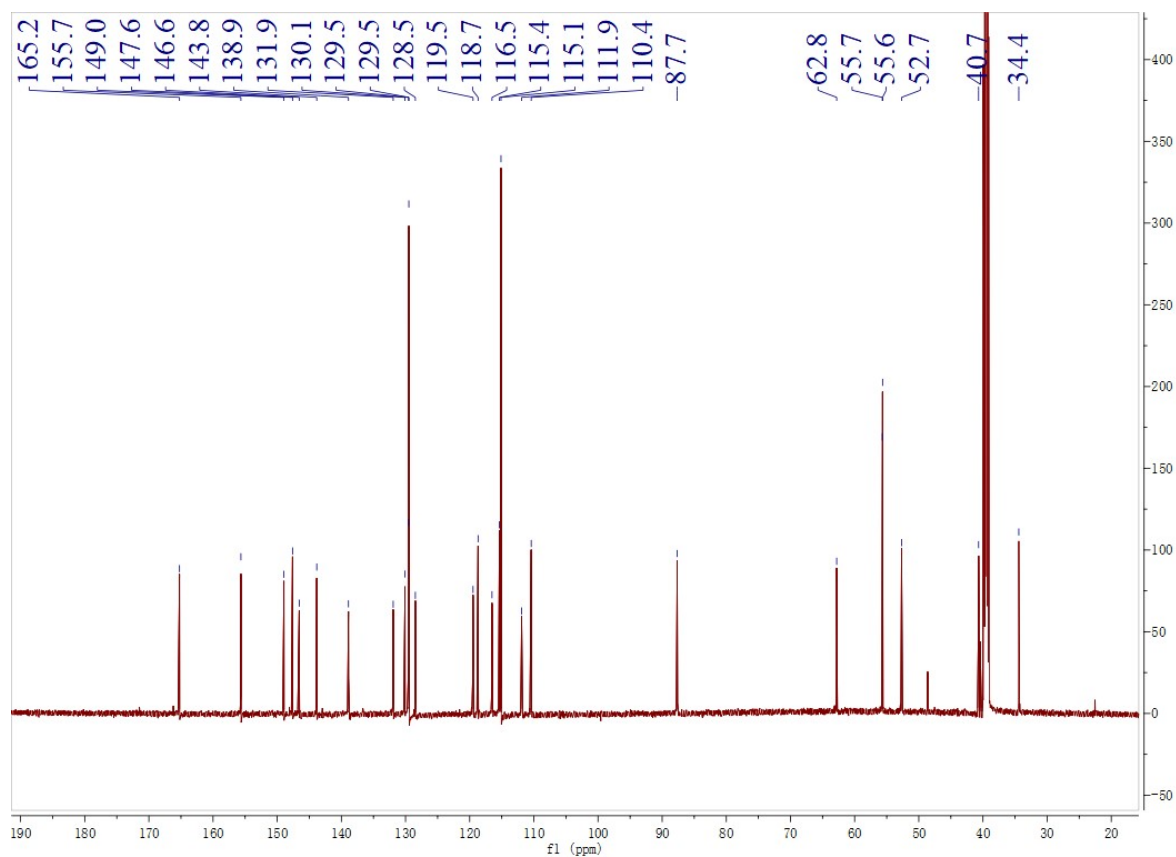

**Fig. S16.** The  $^{13}\text{C}$  NMR (150 MHz,  $\text{DMSO-}d_6$ ) spectrum of compounds **3a/3b**

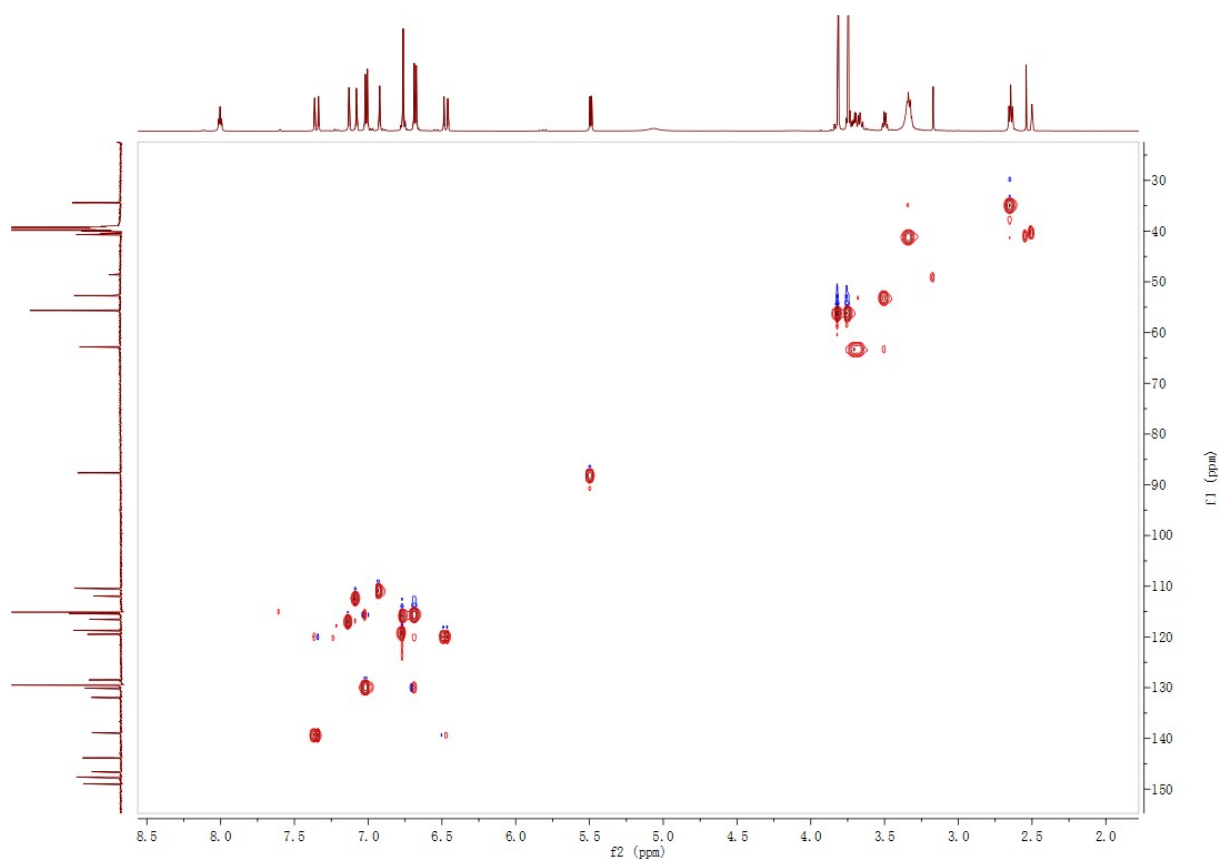

**Fig. S17.** The HSQC (600 MHz, DMSO- $d_6$ ) spectrum of compounds **3a/3b**

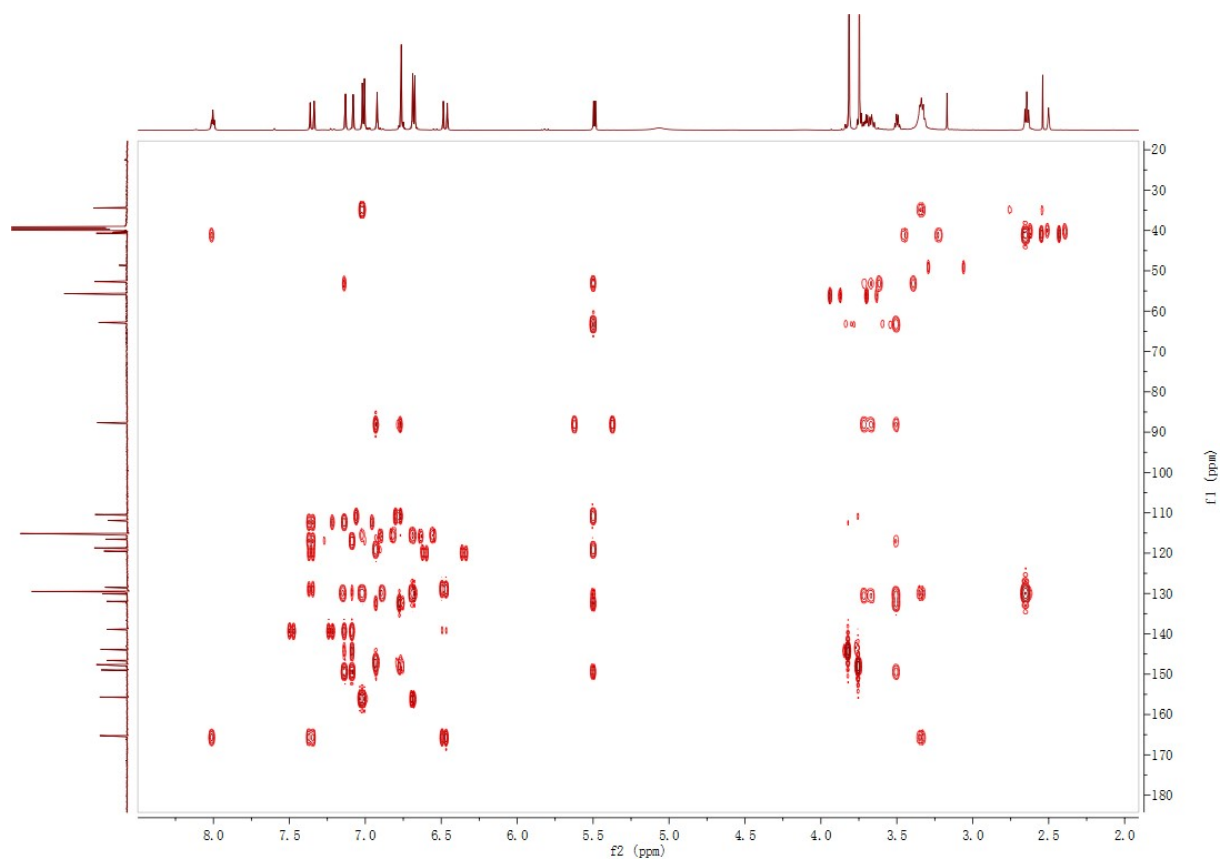

**Fig. S18.** The HMBC (600 MHz, DMSO- $d_6$ ) spectrum of compounds **3a/3b**

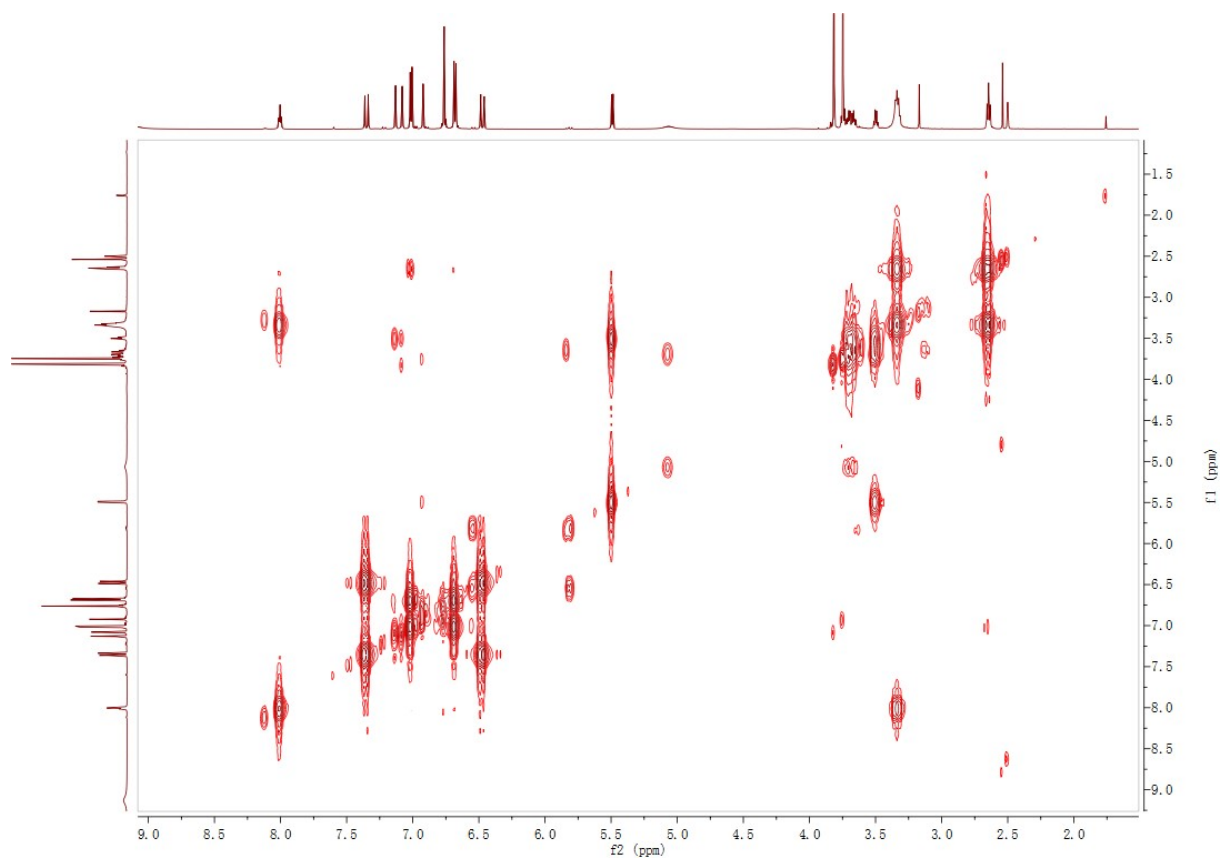

**Fig. S19.** The  $^1\text{H}$ - $^1\text{H}$  COSY (600 MHz,  $\text{DMSO}-d_6$ ) spectrum of compounds **3a/3b**

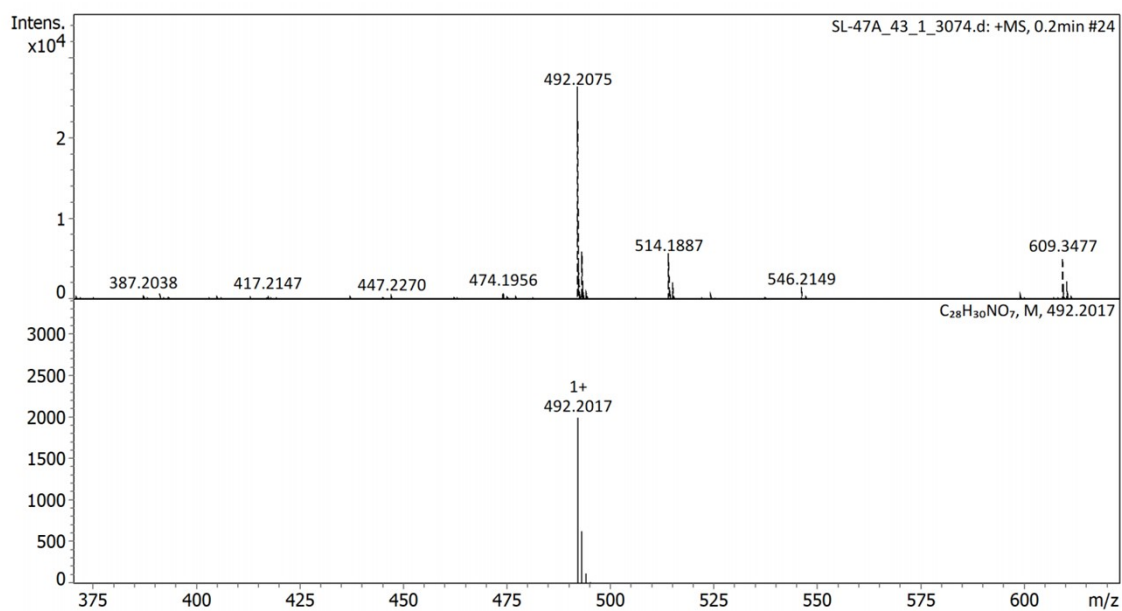

**Fig. S20.** The HRESIMS spectrum of compounds **3a/3b**

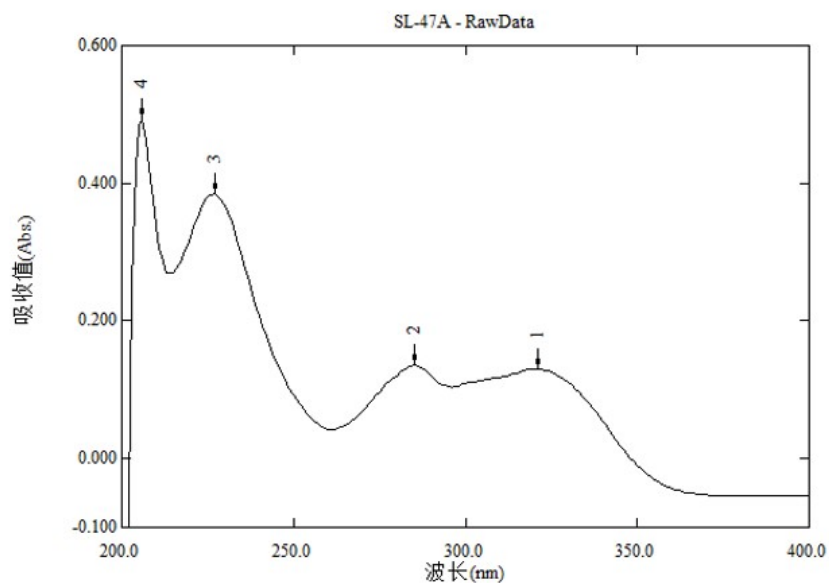

阈值: 0.050000  
点数: 4

| No. | P/V | 波长(nm) | 吸收值(Abs.) | 说明 |
|-----|-----|--------|-----------|----|
| 1   | ⊕   | 321.0  | 0.130     |    |
| 2   | ⊕   | 285.0  | 0.135     |    |
| 3   | ⊕   | 227.0  | 0.384     |    |
| 4   | ⊕   | 206.0  | 0.493     |    |

Fig. S21. The UV spectrum of compounds **3a/3b**

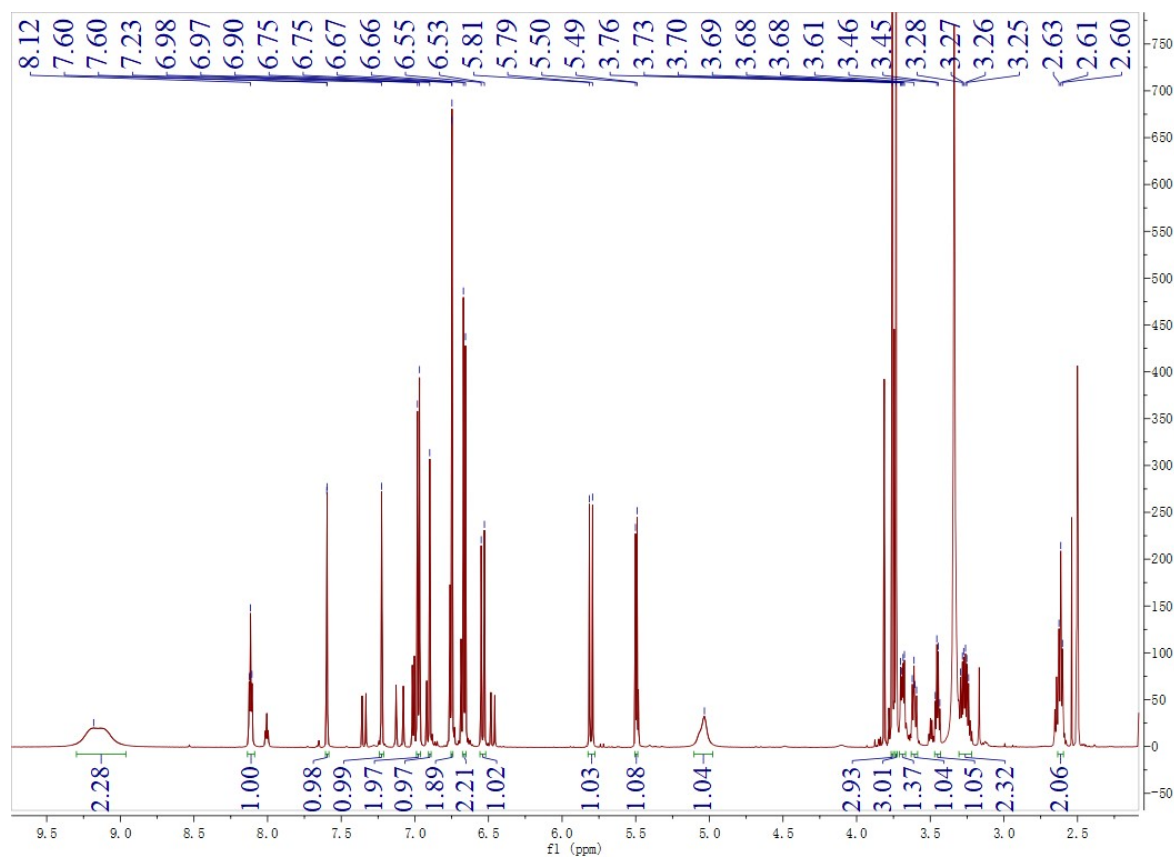

Fig. S22. The  $^1\text{H}$  NMR (600 MHz,  $\text{DMSO-}d_6$ ) spectrum of compounds **4a/4b**

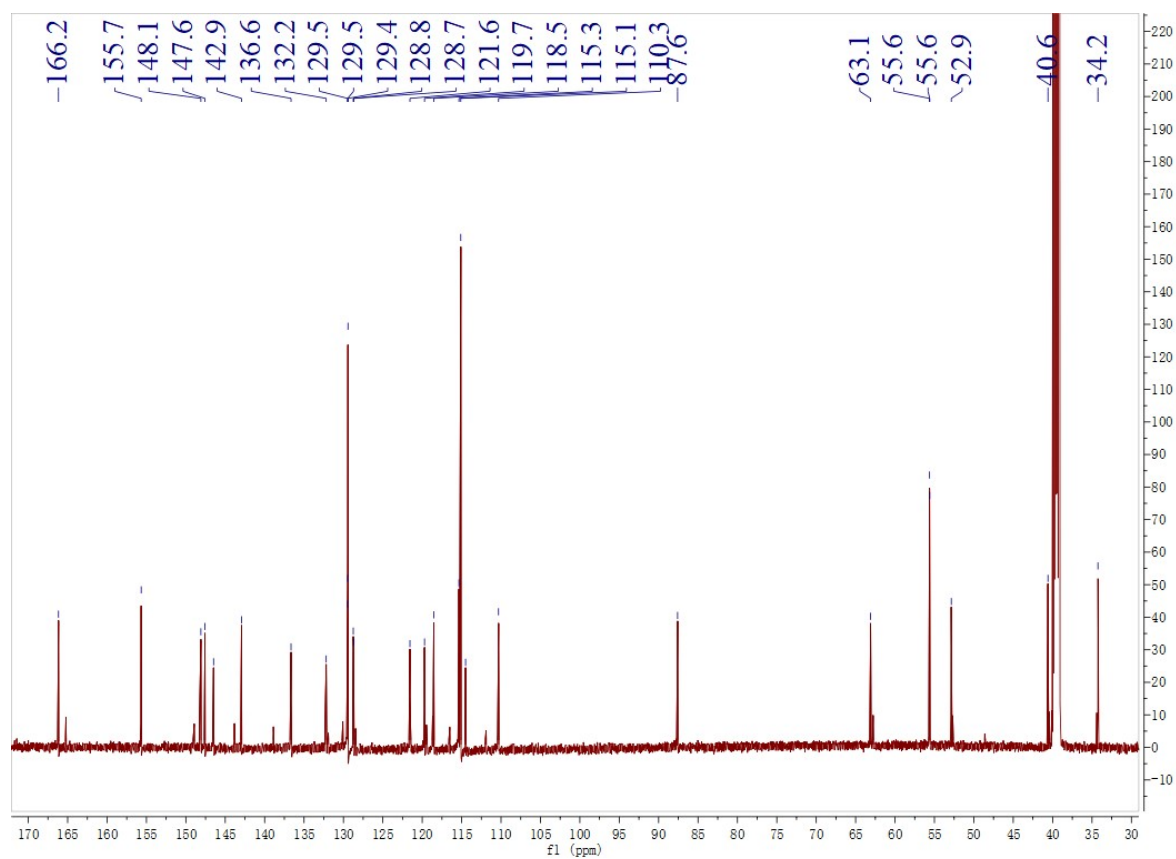

**Fig. S23.** The  $^{13}\text{C}$  NMR (150 MHz,  $\text{DMSO-}d_6$ ) spectrum of compounds **4a/4b**

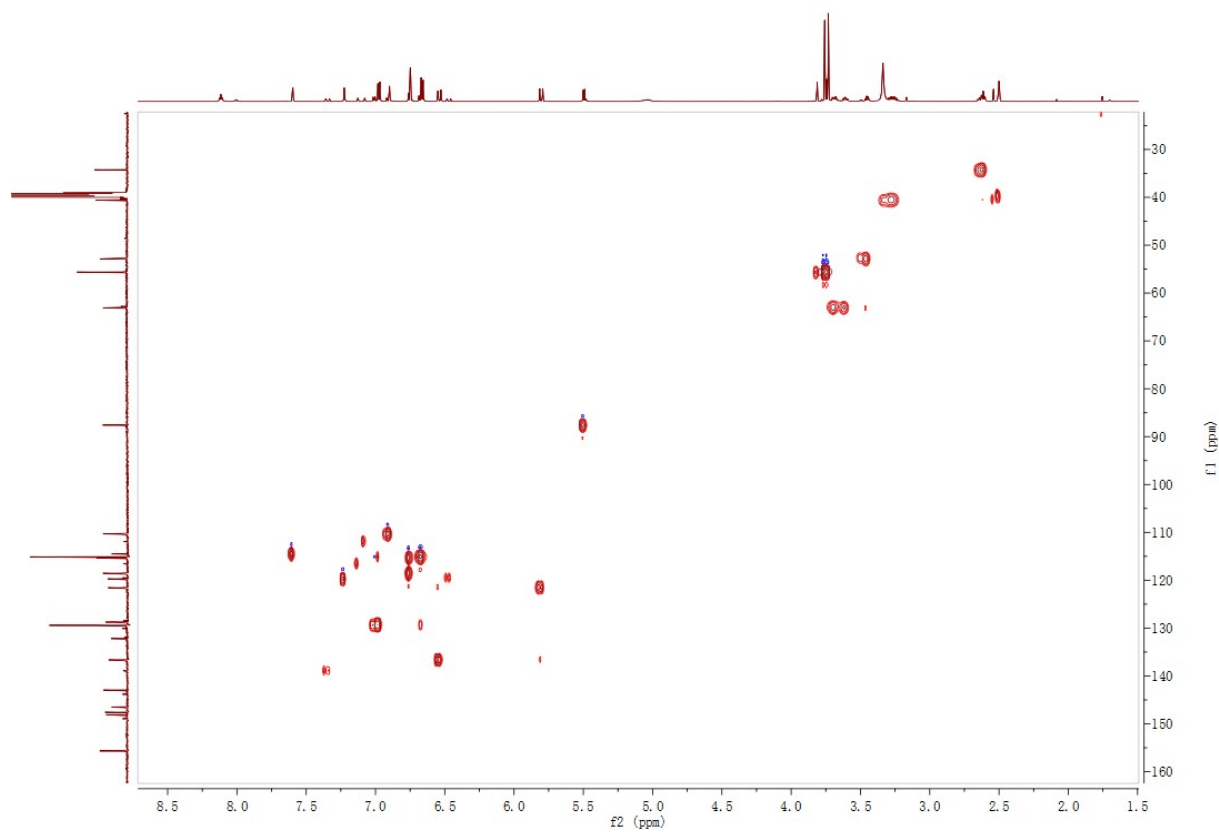

**Fig. S24.** The HSQC (600 MHz,  $\text{DMSO-}d_6$ ) spectrum of compounds **4a/4b**

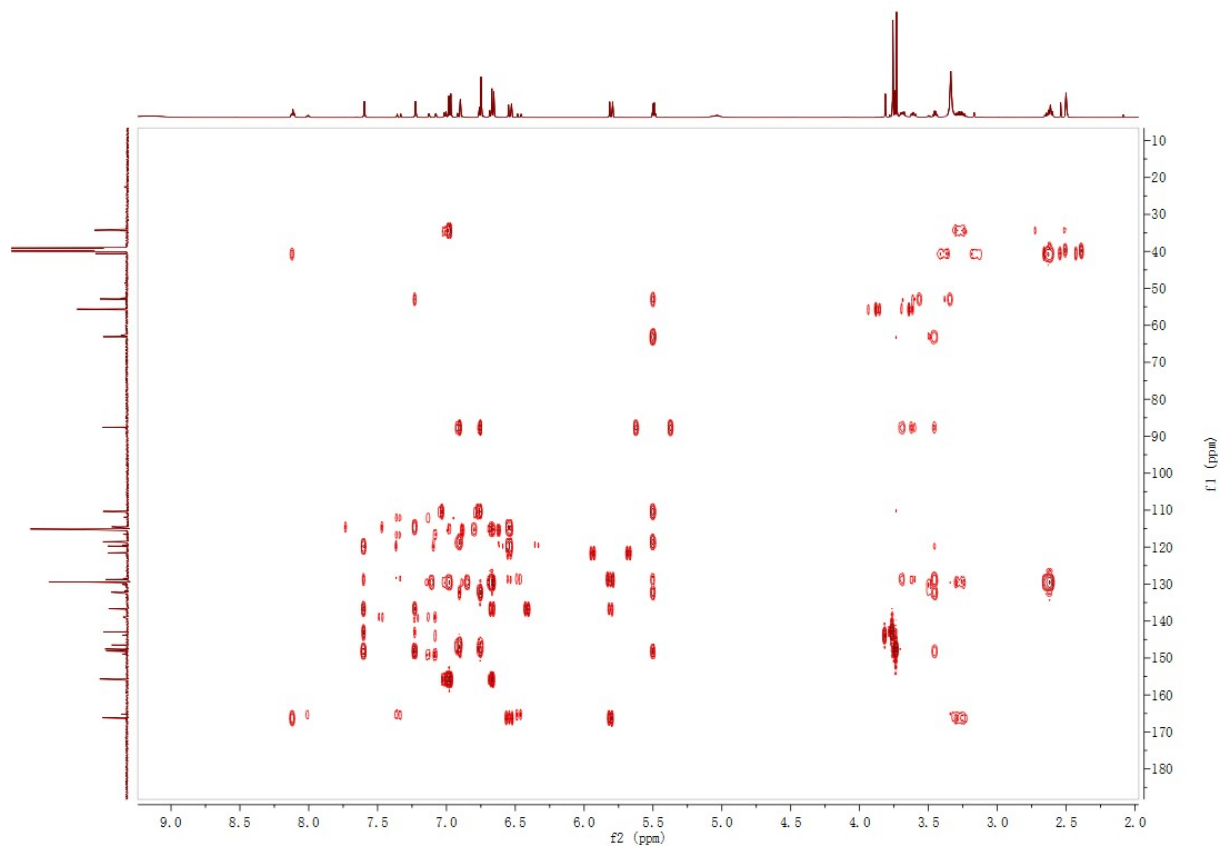

**Fig. S25.** The HMBC (600 MHz, DMSO- $d_6$ ) spectrum of compounds **4a/4b**

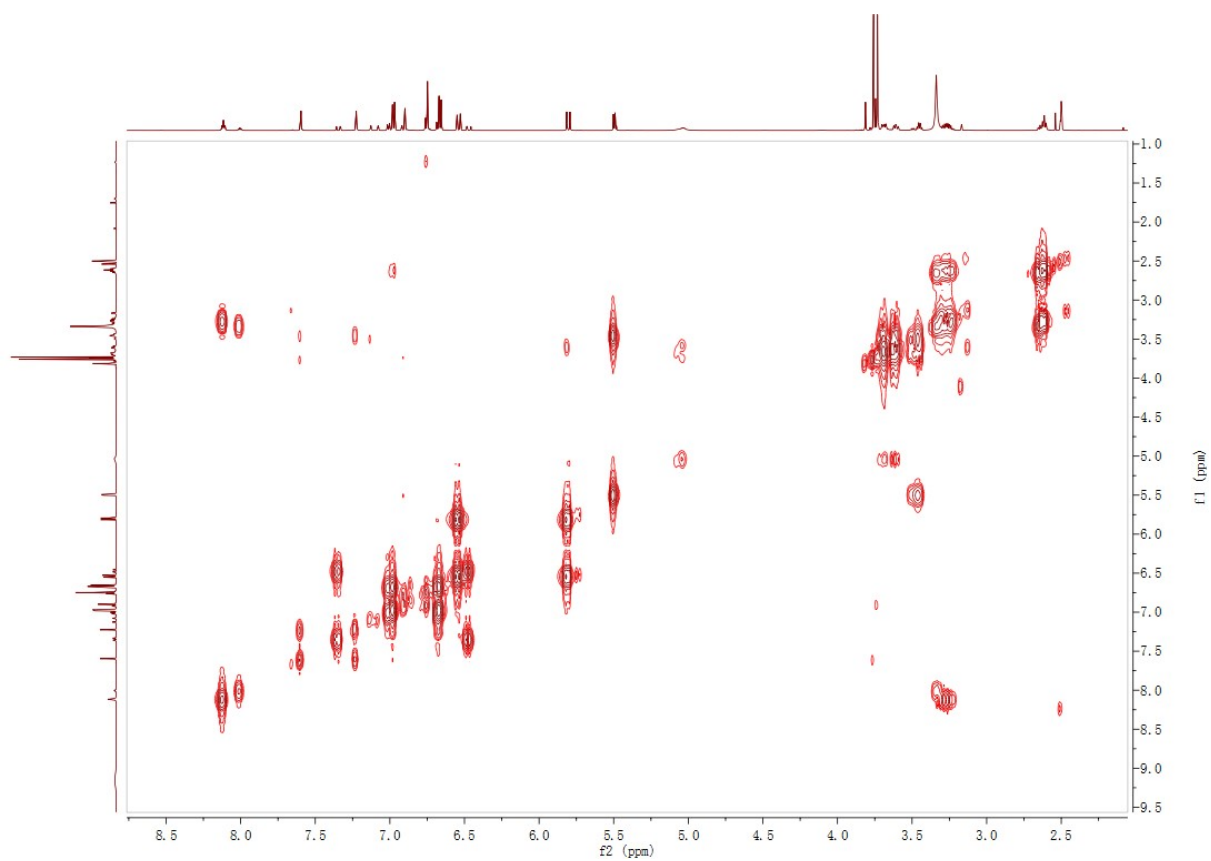

**Fig. S26.** The  $^1\text{H}$ - $^1\text{H}$  COSY (600 MHz, DMSO- $d_6$ ) spectrum of compounds **4a/4b**



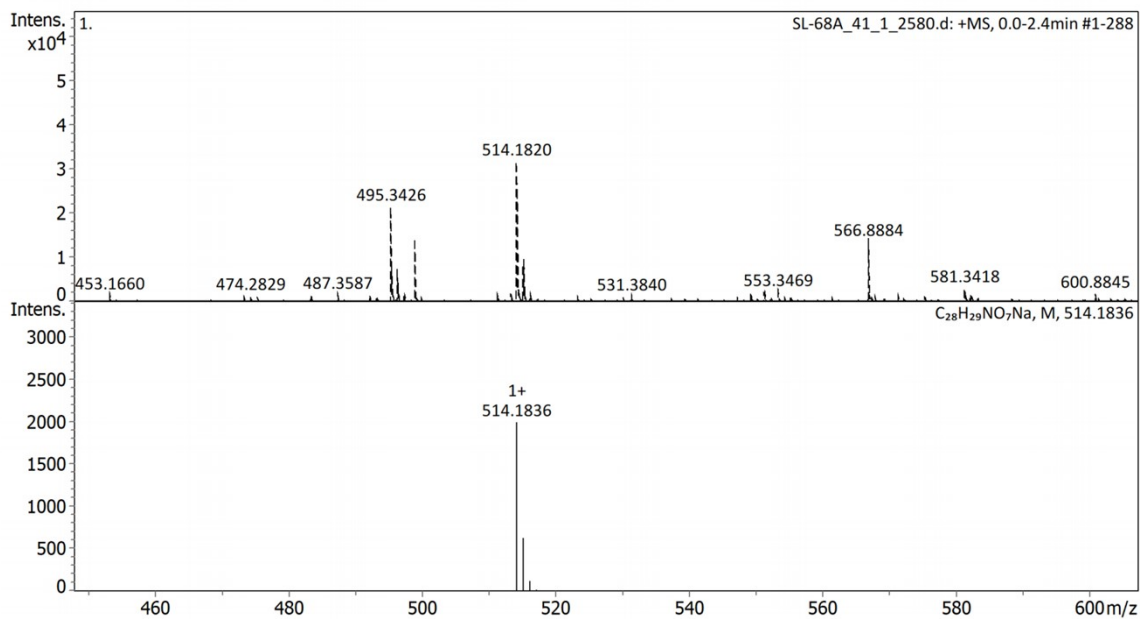

**Fig. S27.** The HRESIMS spectrum of compounds **4a/4b**

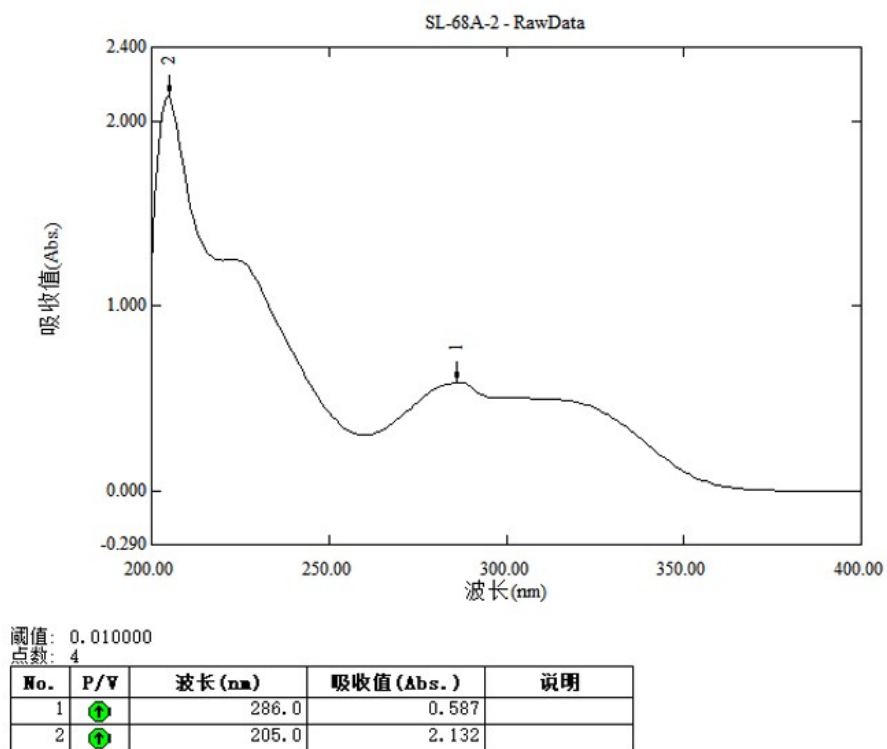

**Fig. S28.** The UV spectrum of compounds **4a/4b**

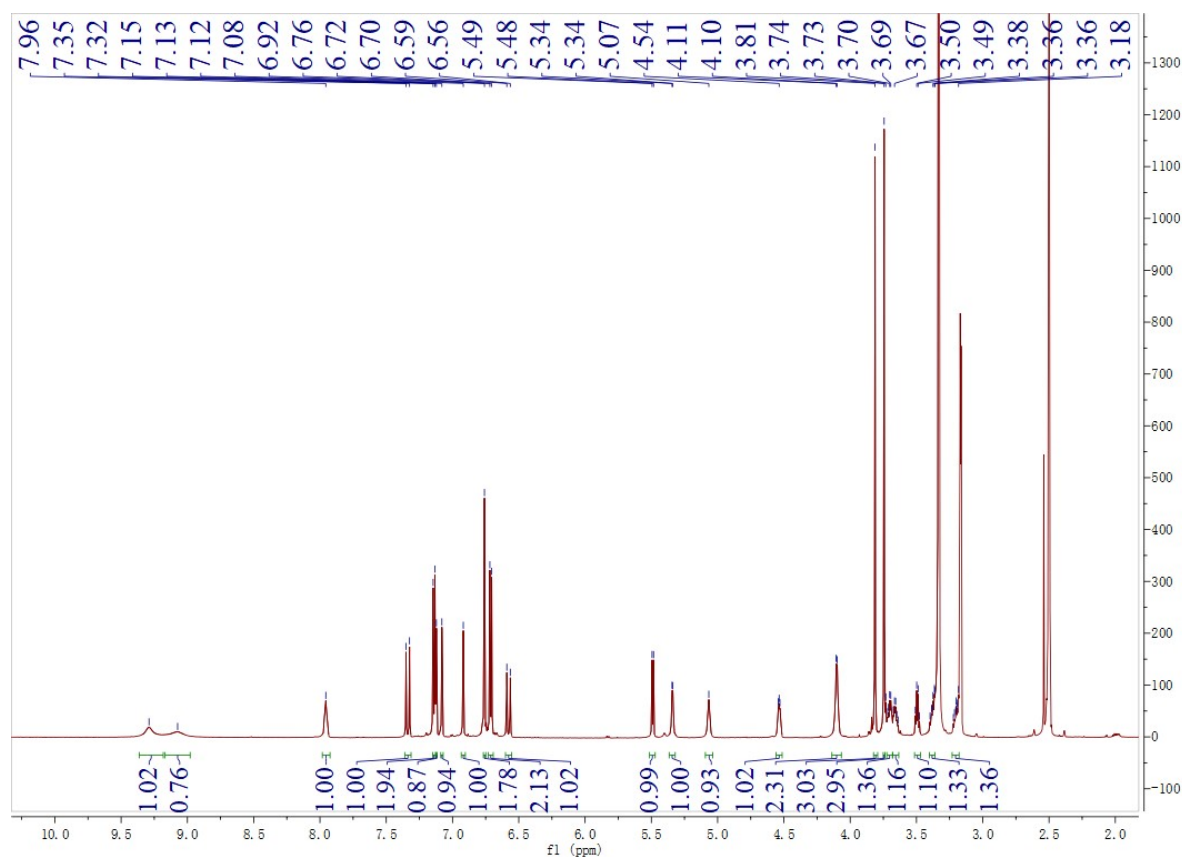

**Fig. S29.** The  $^1\text{H}$  NMR (600 MHz,  $\text{DMSO-}d_6$ ) spectrum of compounds **5a/5b**

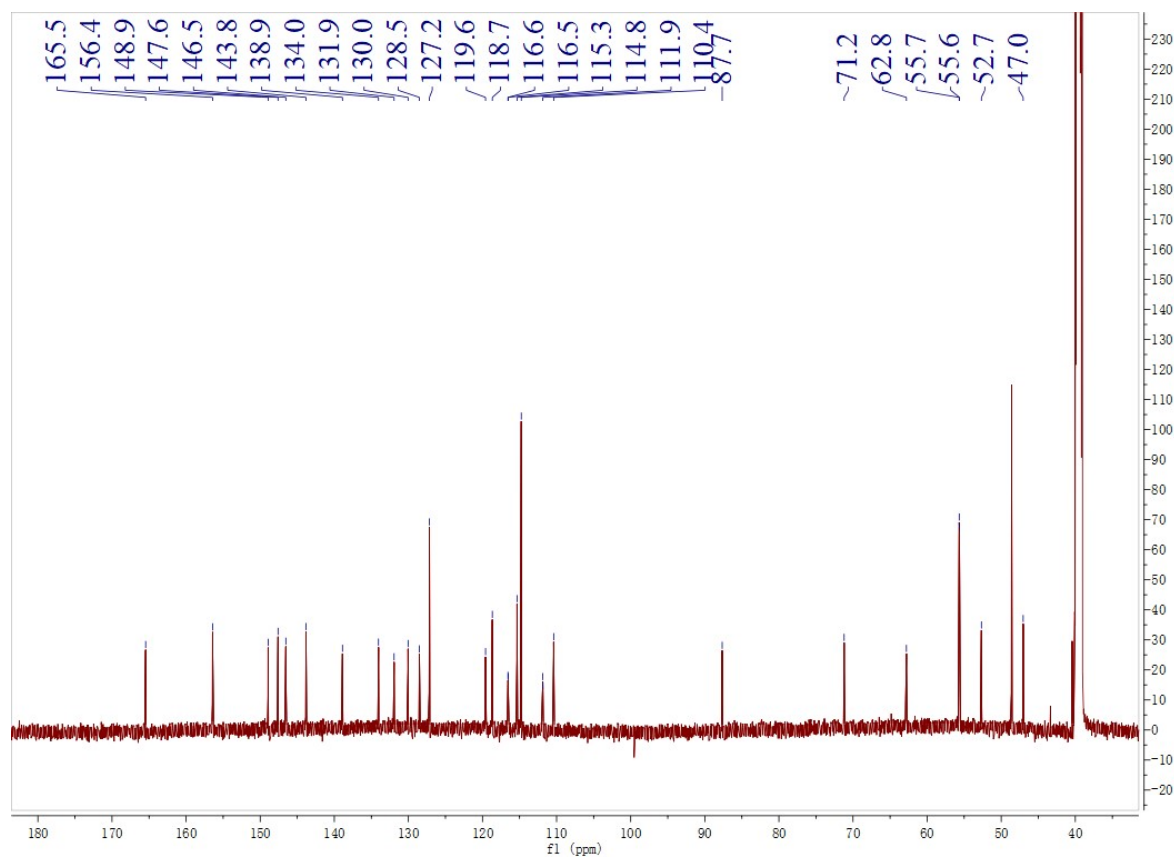

**Fig. S30.** The  $^{13}\text{C}$  NMR (150 MHz,  $\text{DMSO-}d_6$ ) spectrum of compounds **5a/5b**

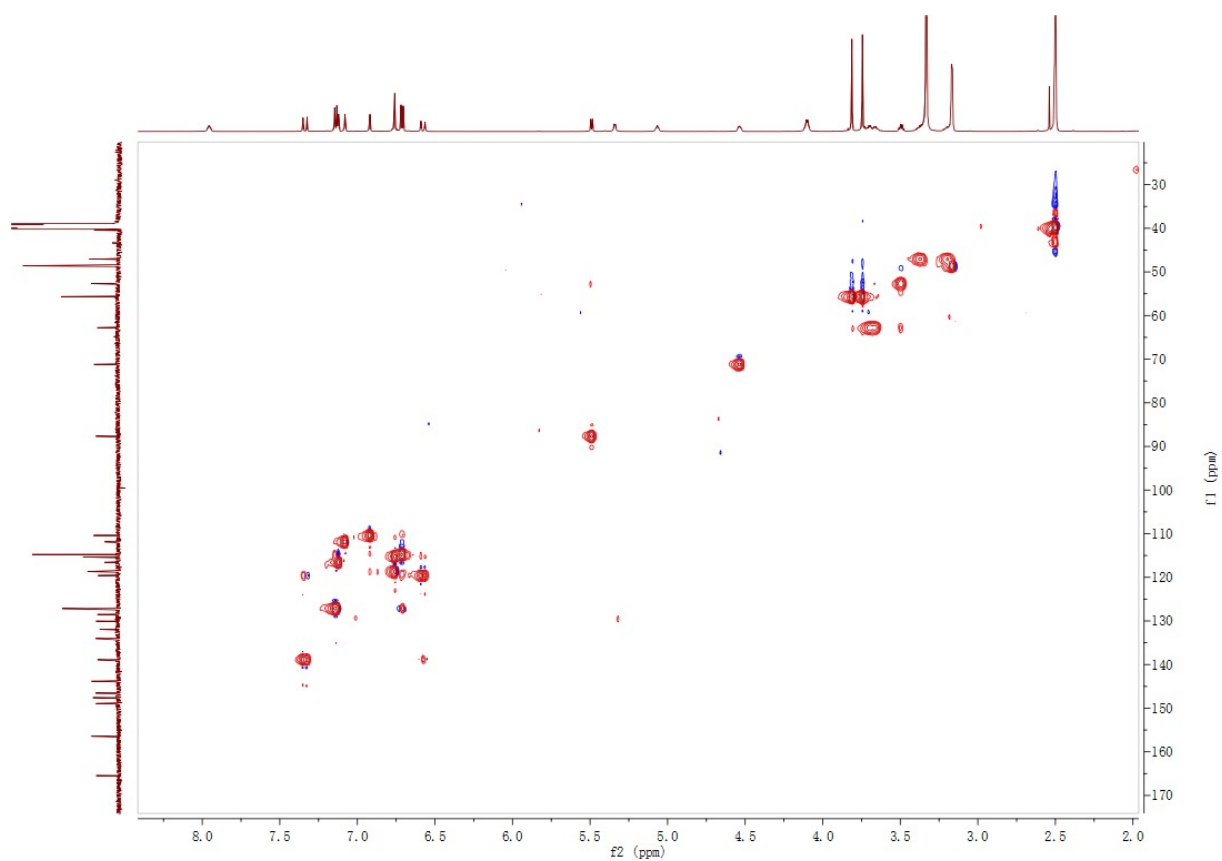

**Fig. S31.** The HSQC (600 MHz, DMSO-*d*<sub>6</sub>) spectrum of compounds **5a/5b**

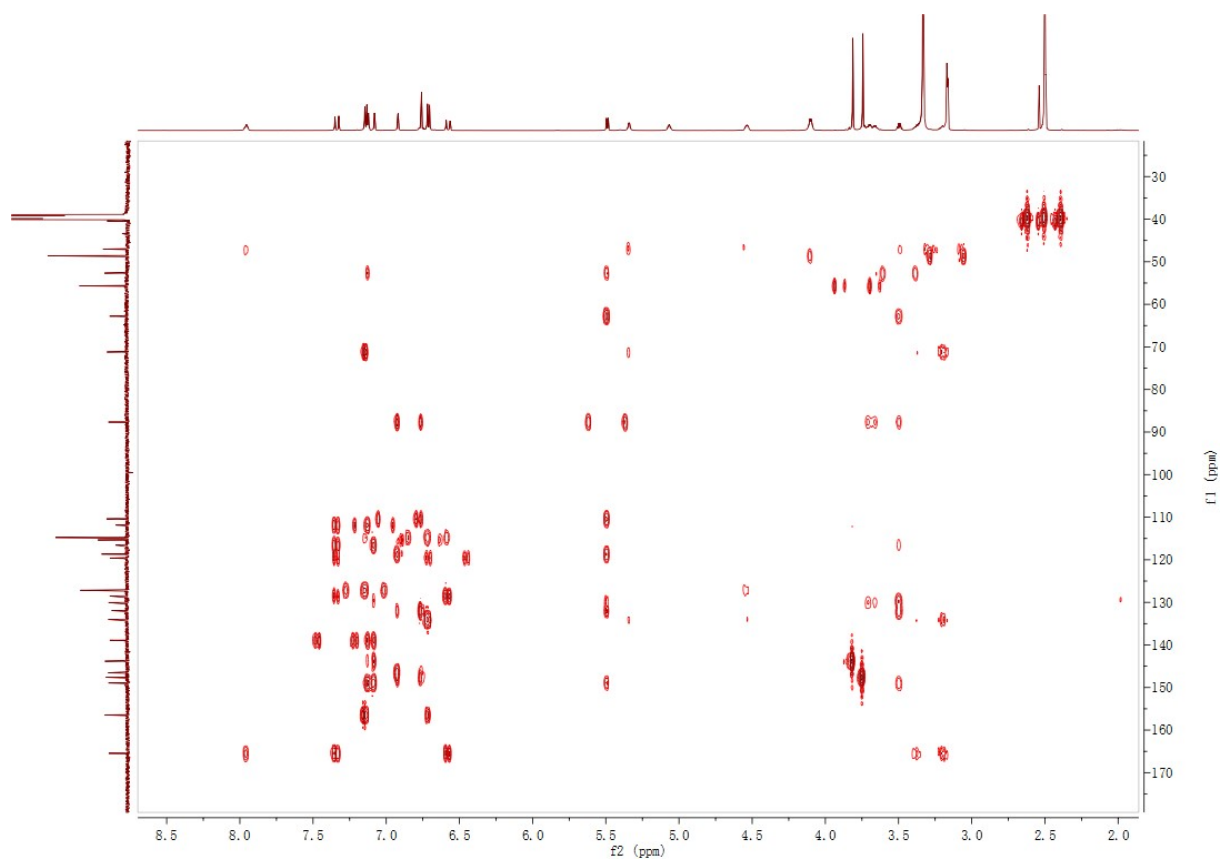

**Fig. S32.** The HMBC (600 MHz, DMSO-*d*<sub>6</sub>) spectrum of compounds **5a/5b**

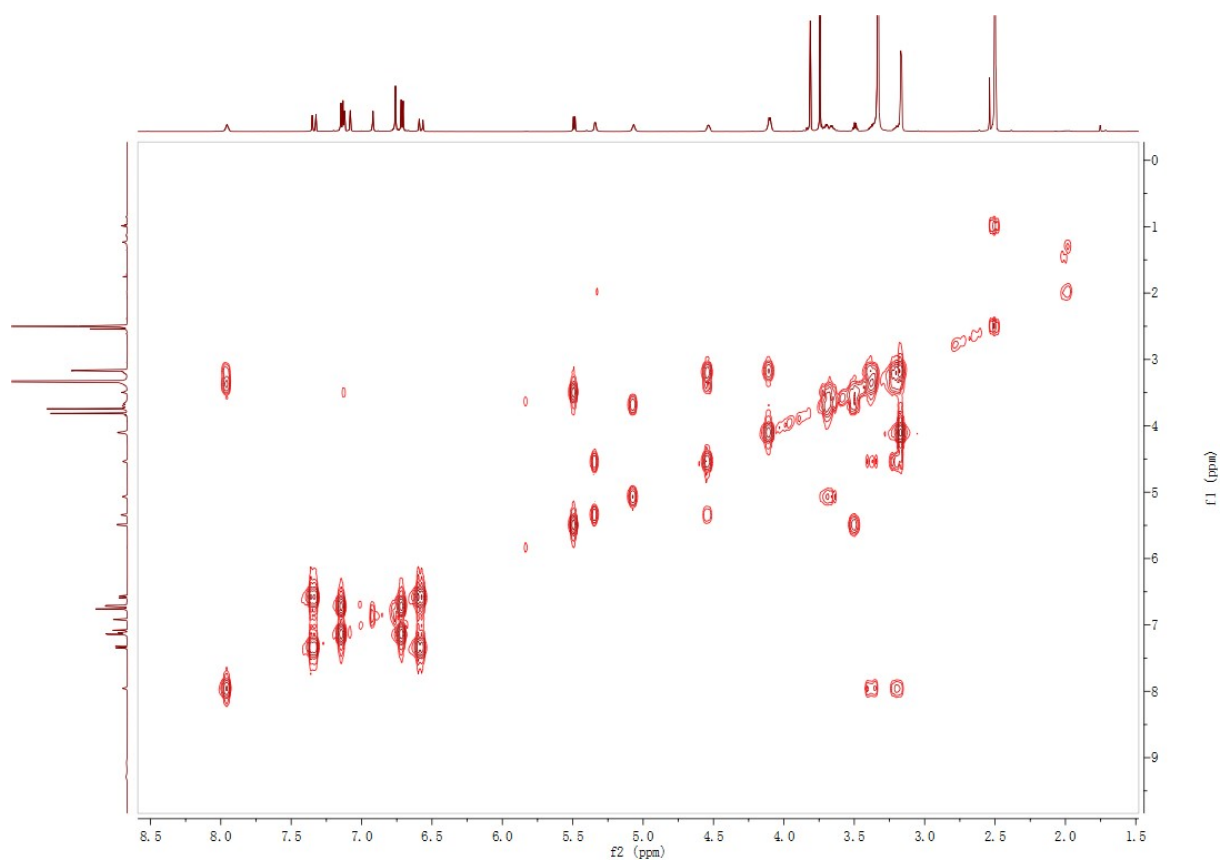

**Fig. S33.** The  $^1\text{H}$ - $^1\text{H}$  COSY (600 MHz,  $\text{DMSO-}d_6$ ) spectrum of compounds **5a/5b**

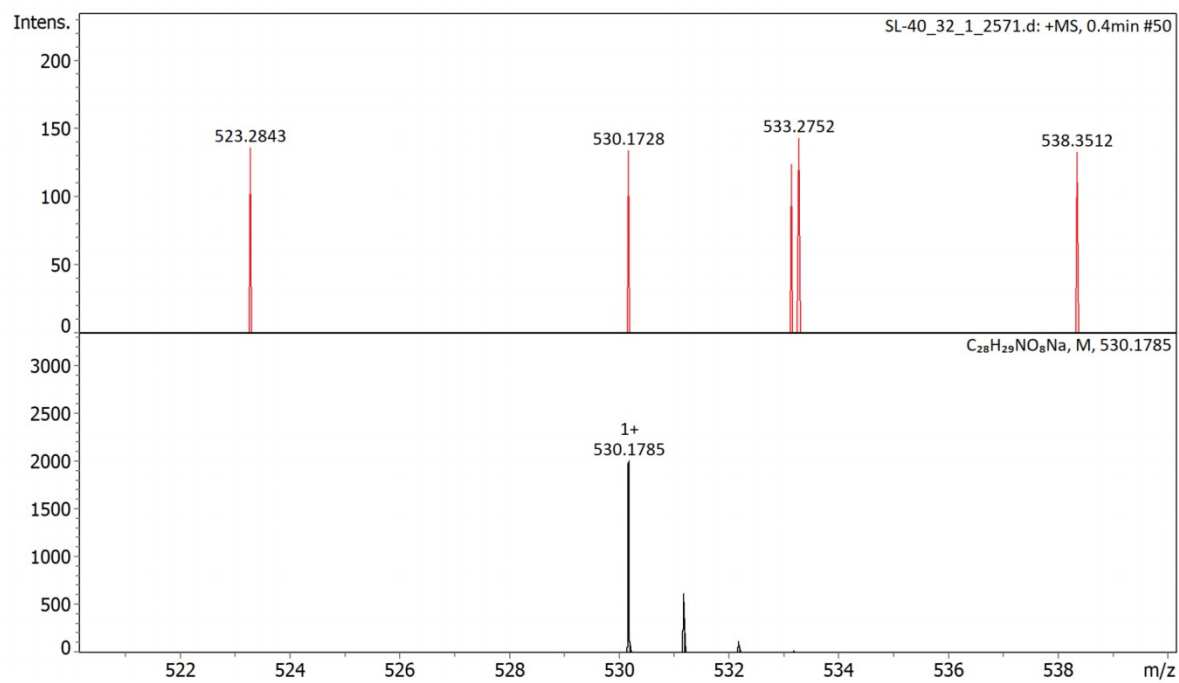

**Fig. S34.** The HRESIMS spectrum of compounds **5a/5b**

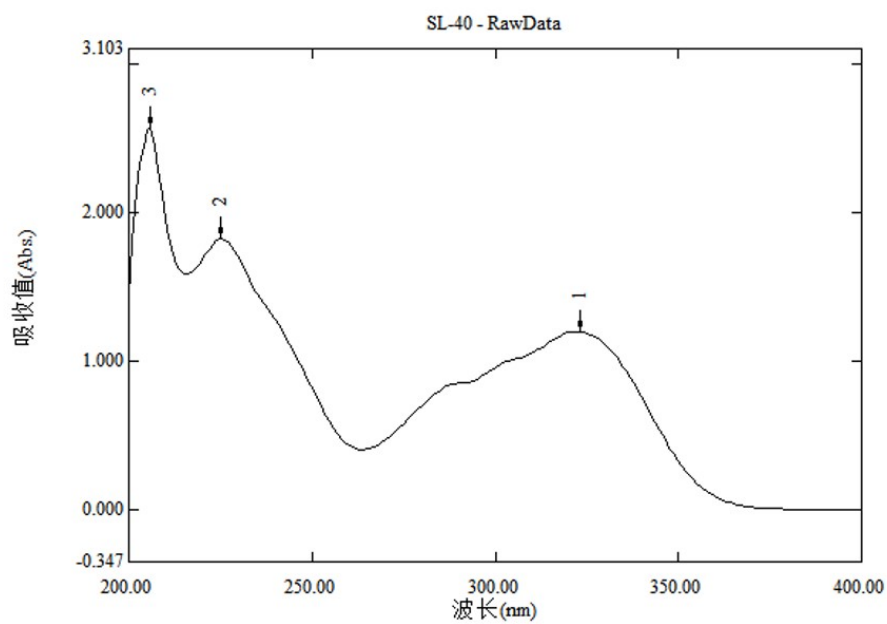

阈值: 0.010000  
点数: 4

| No. | P/V | 波长 (nm) | 吸收值 (Abs.) | 说明 |
|-----|-----|---------|------------|----|
| 1   |     | 323.0   | 1.201      |    |
| 2   |     | 225.0   | 1.821      |    |

**Fig. S35.** The UV spectrum of compounds **5a/5b**

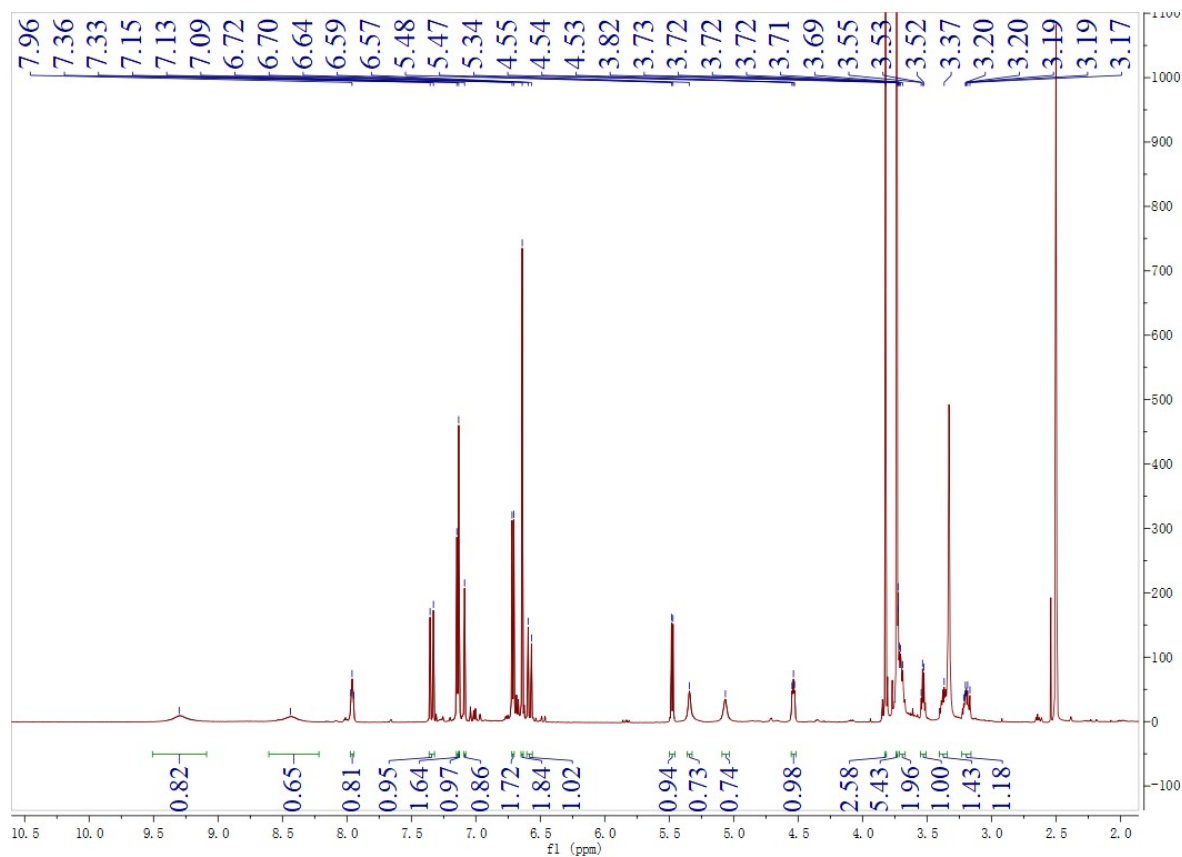

**Fig. S36.** The  $^1\text{H}$  NMR (600 MHz,  $\text{DMSO}-d_6$ ) spectrum of compounds **6a/6b**

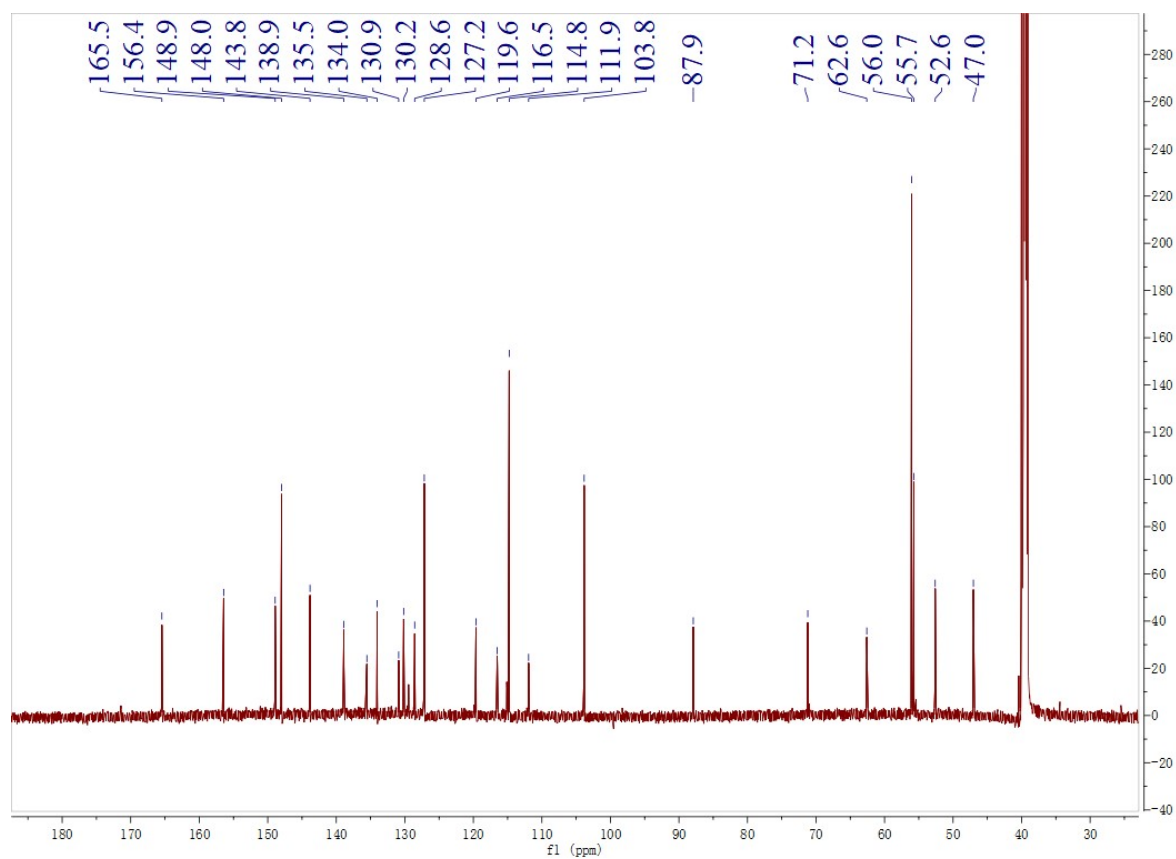

**Fig. S37.** The  $^{13}\text{C}$  NMR (150 MHz,  $\text{DMSO-}d_6$ ) spectrum of compounds **6a/6b**

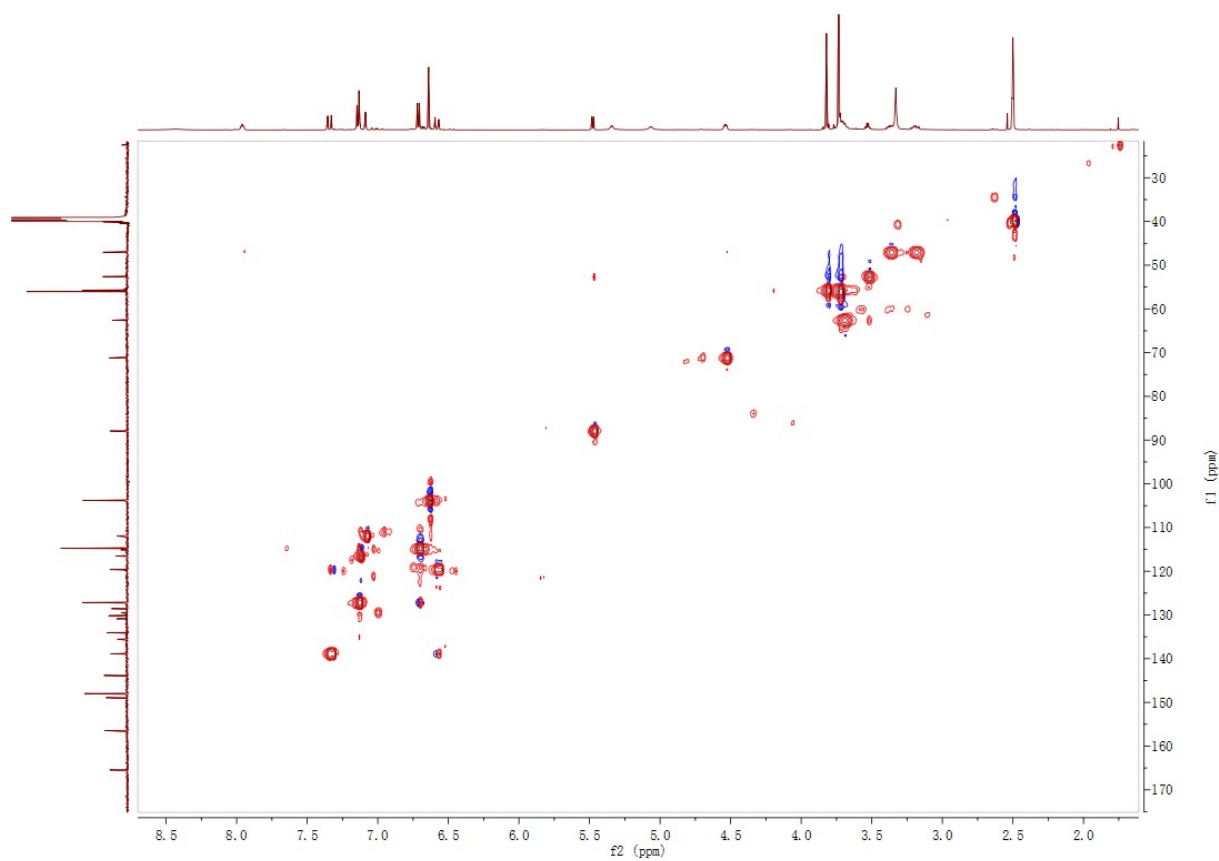

**Fig. S38.** The HSQC (600 MHz,  $\text{DMSO-}d_6$ ) spectrum of compounds **6a/6b**

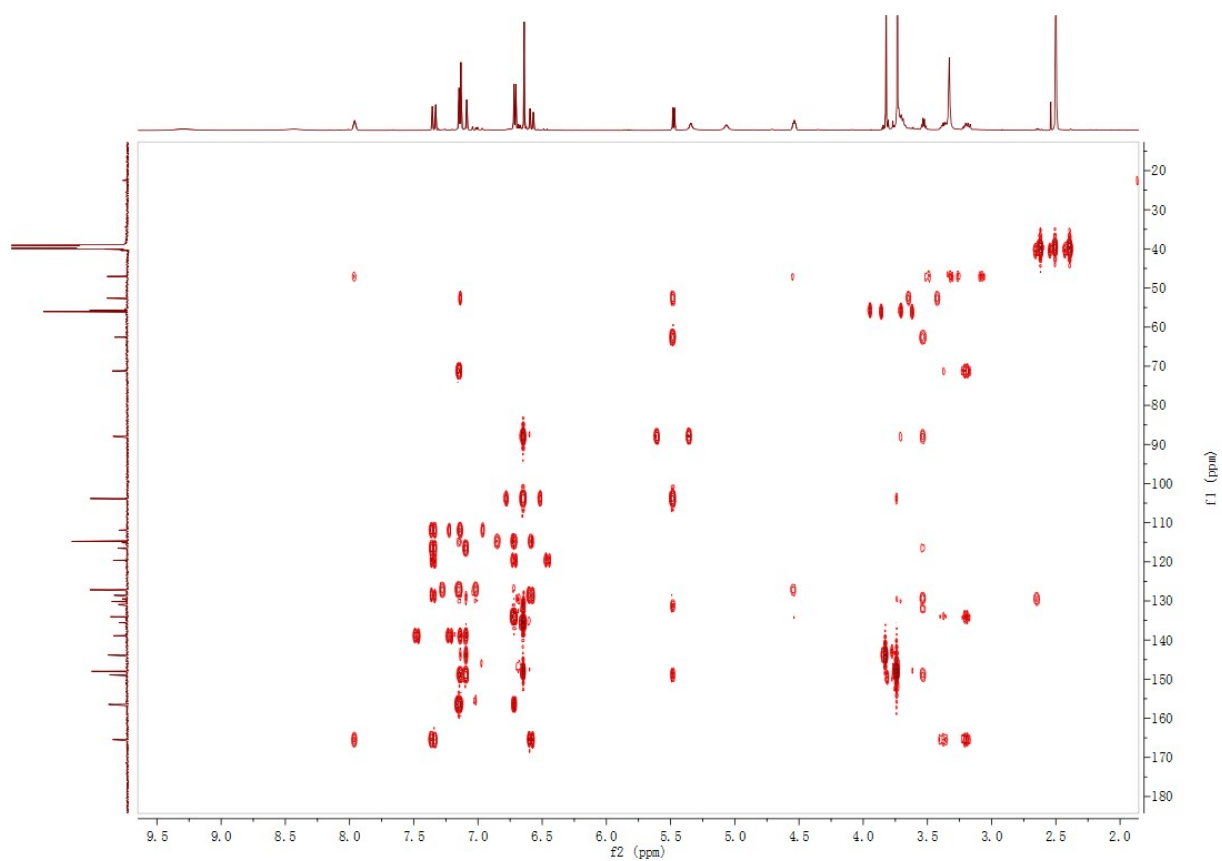

**Fig. S39.** The HMBC (600 MHz,  $\text{DMSO-}d_6$ ) spectrum of compounds **6a/6b**

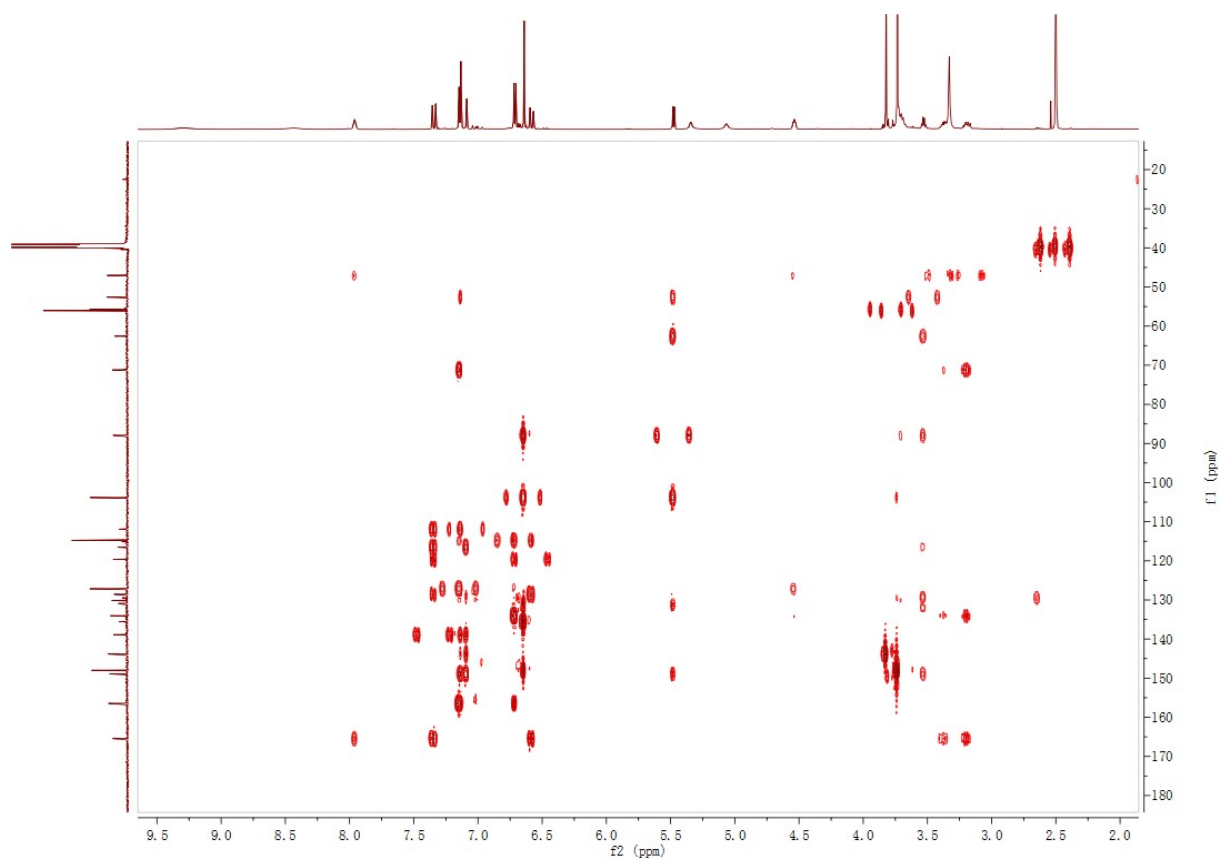

**Fig. S40.** The  $^1\text{H}$ - $^1\text{H}$  COSY (600 MHz,  $\text{DMSO-}d_6$ ) spectrum of compounds **6a/6b**

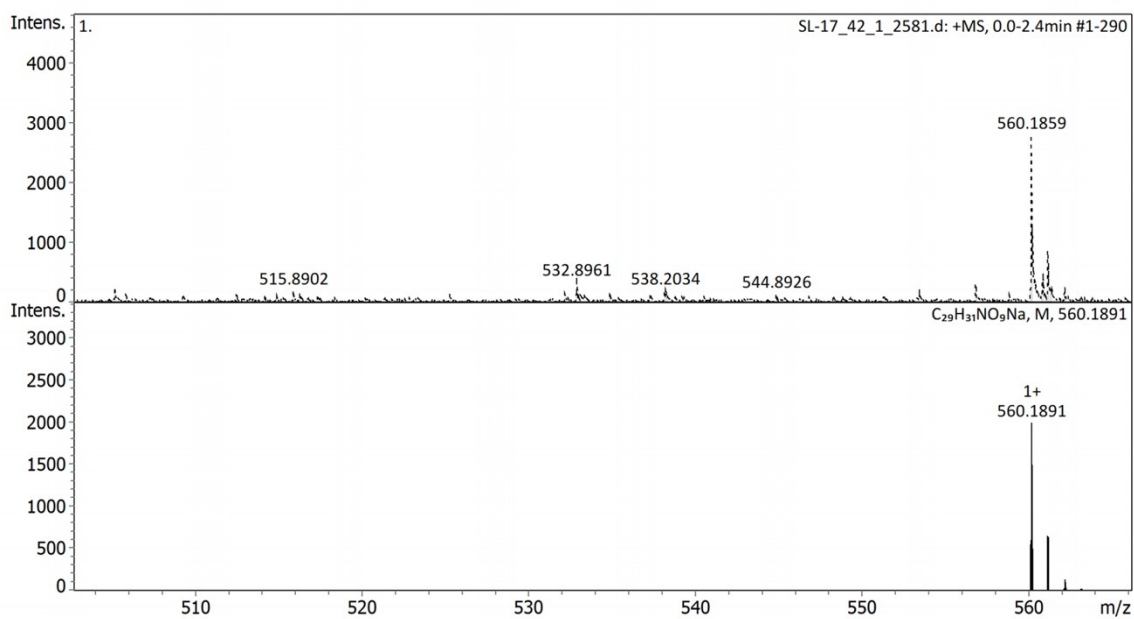

**Fig. S41.** The HRESIMS spectrum of compounds **6a/6b**

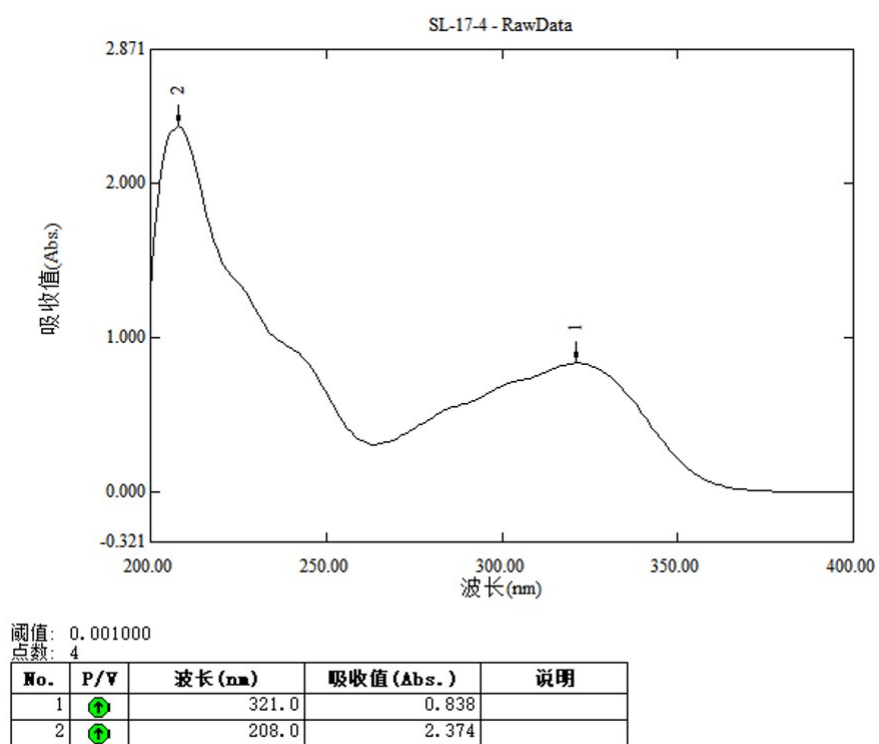

**Fig. S42.** The UV spectrum of compounds **6a/6b**



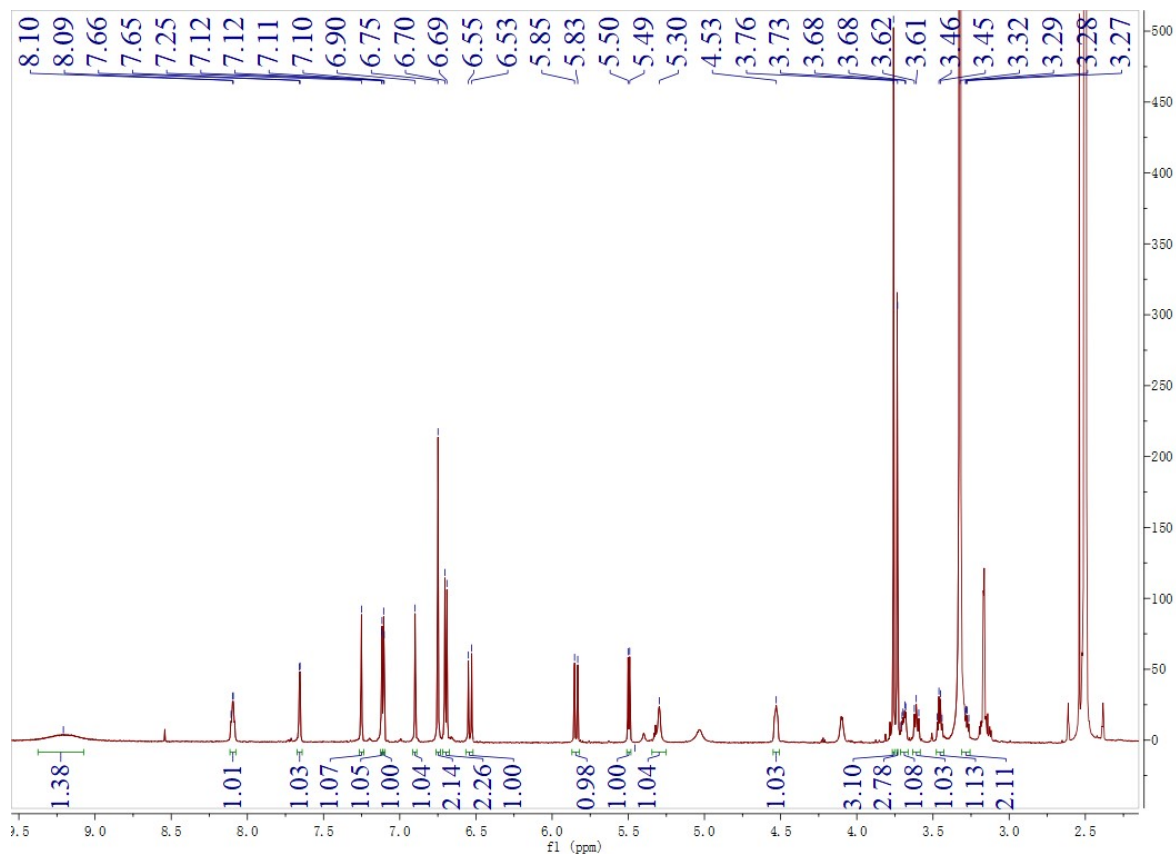

**Fig. S43.** The  $^1\text{H}$  NMR (600 MHz,  $\text{DMSO-}d_6$ ) spectrum of compound **7**

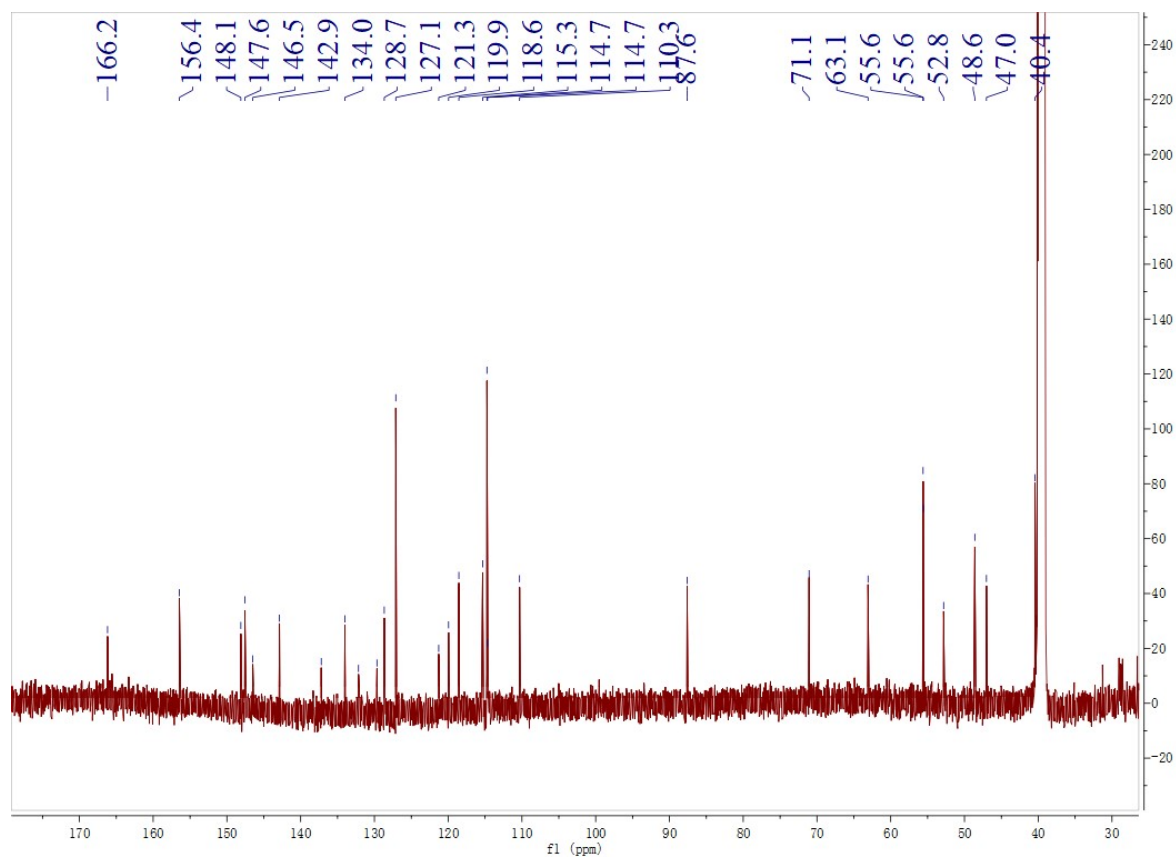

**Fig. S44.** The  $^{13}\text{C}$  NMR (150 MHz,  $\text{DMSO-}d_6$ ) spectrum of compound **7**

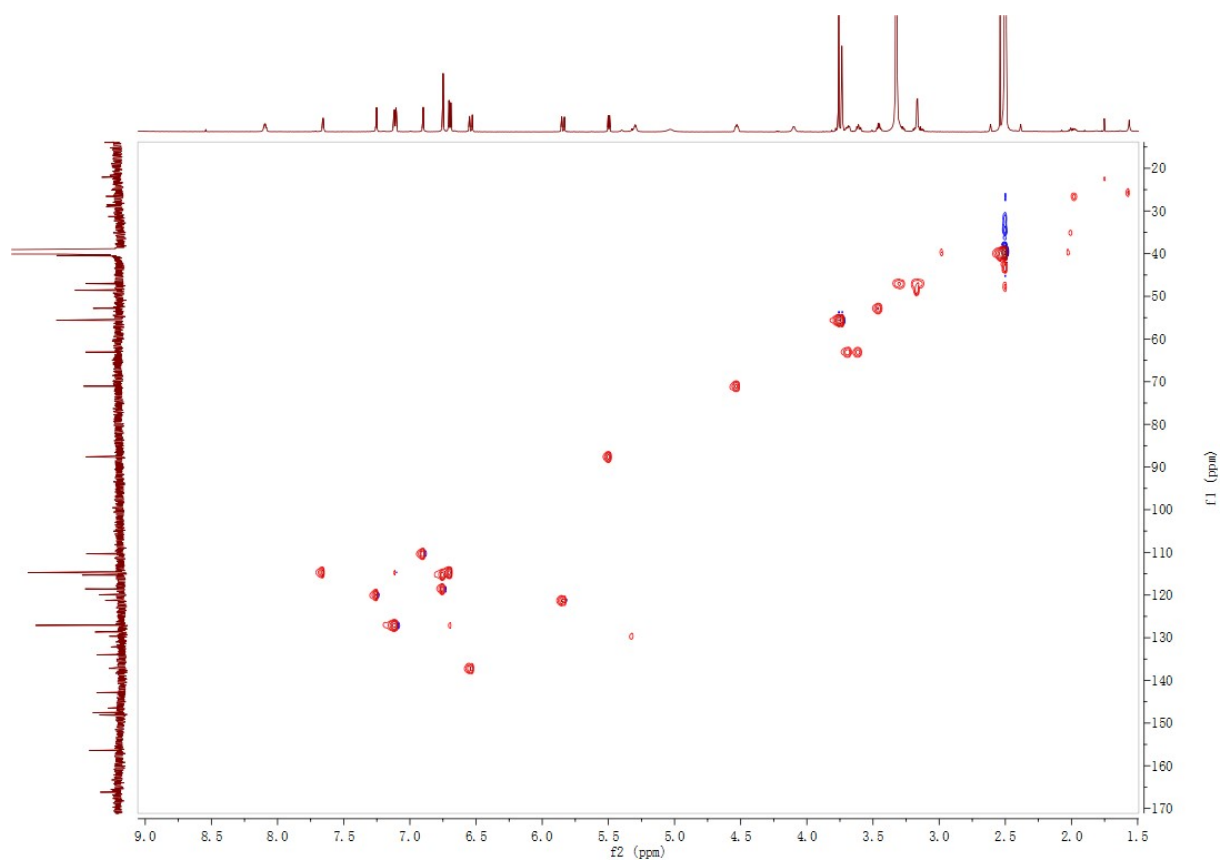

**Fig. S45.** The HSQC (600 MHz, DMSO-*d*<sub>6</sub>) spectrum of compound **7**

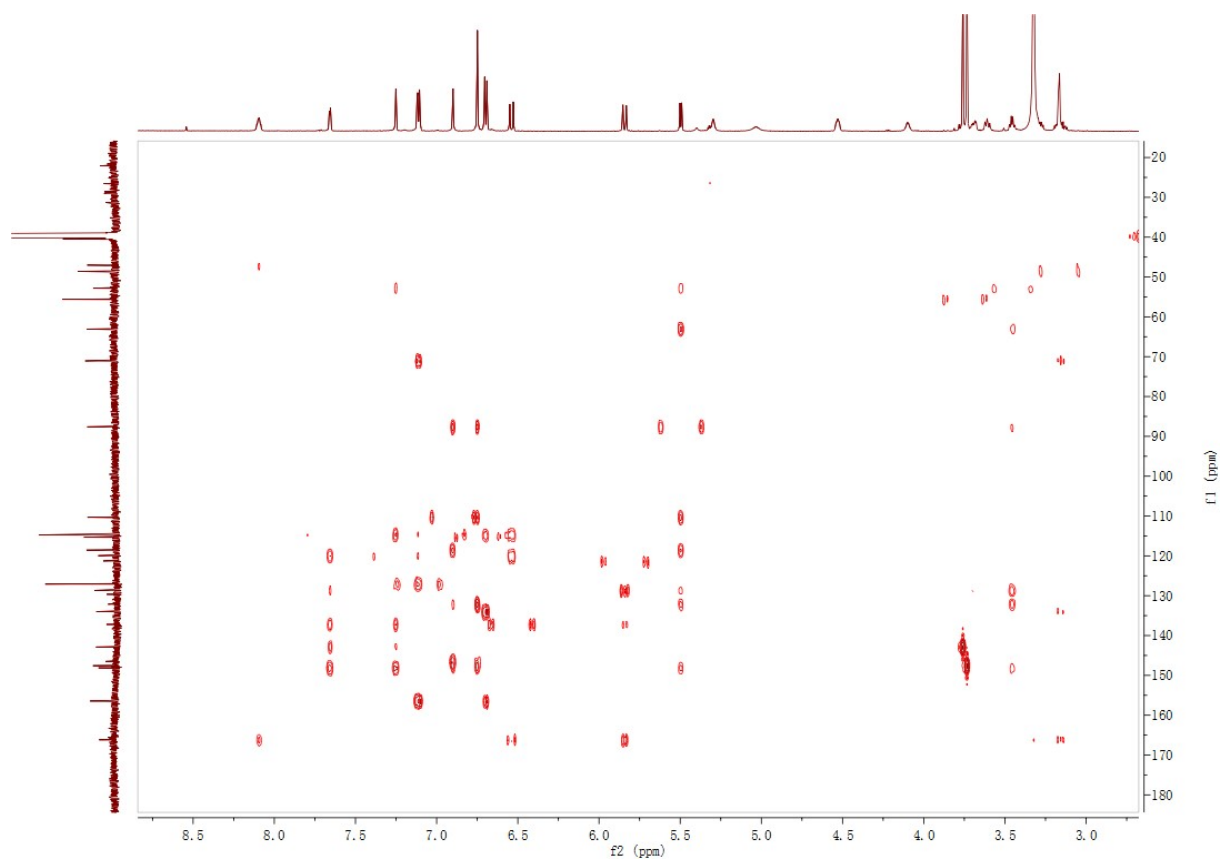

**Fig. S46.** The HMBC (600 MHz, DMSO-*d*<sub>6</sub>) spectrum of compound **7**

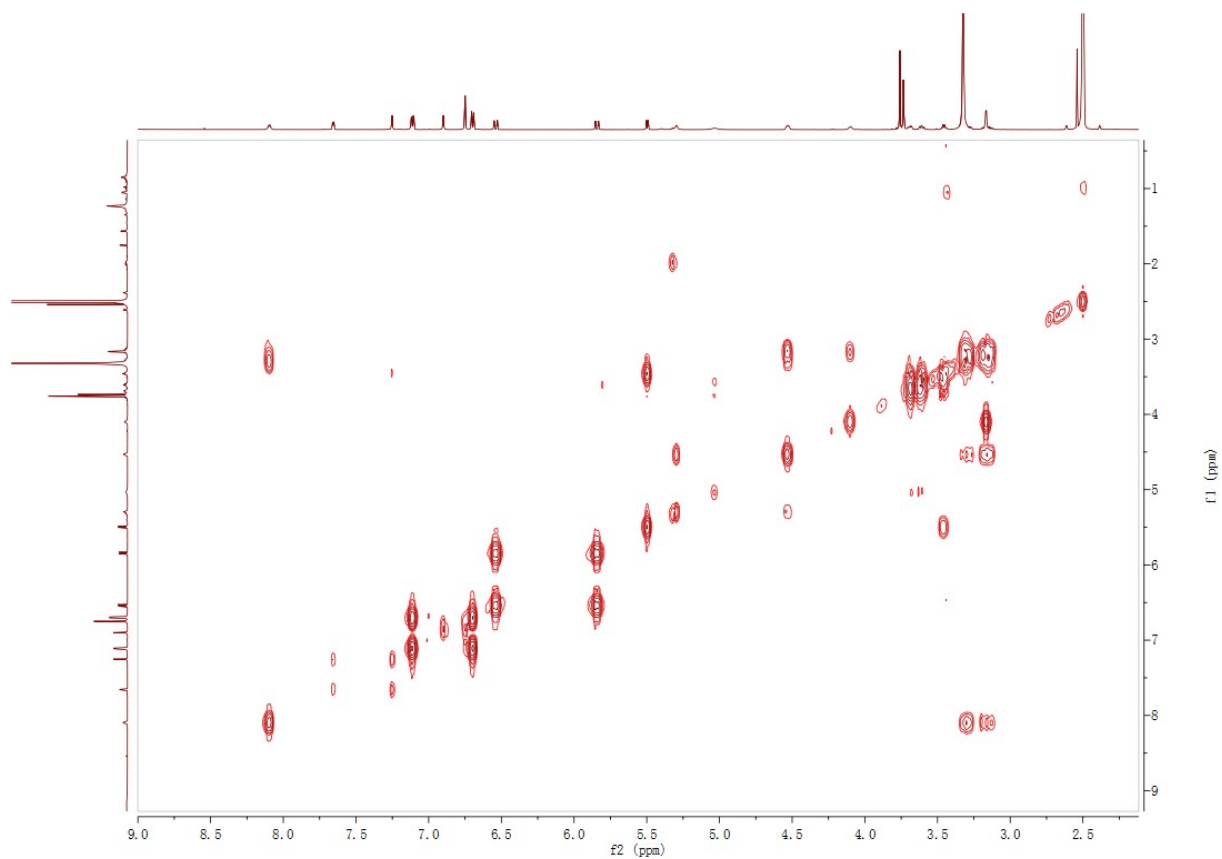

**Fig. S47.** The  $^1\text{H}$ - $^1\text{H}$  COSY (600 MHz,  $\text{DMSO-}d_6$ ) spectrum of compound **7**

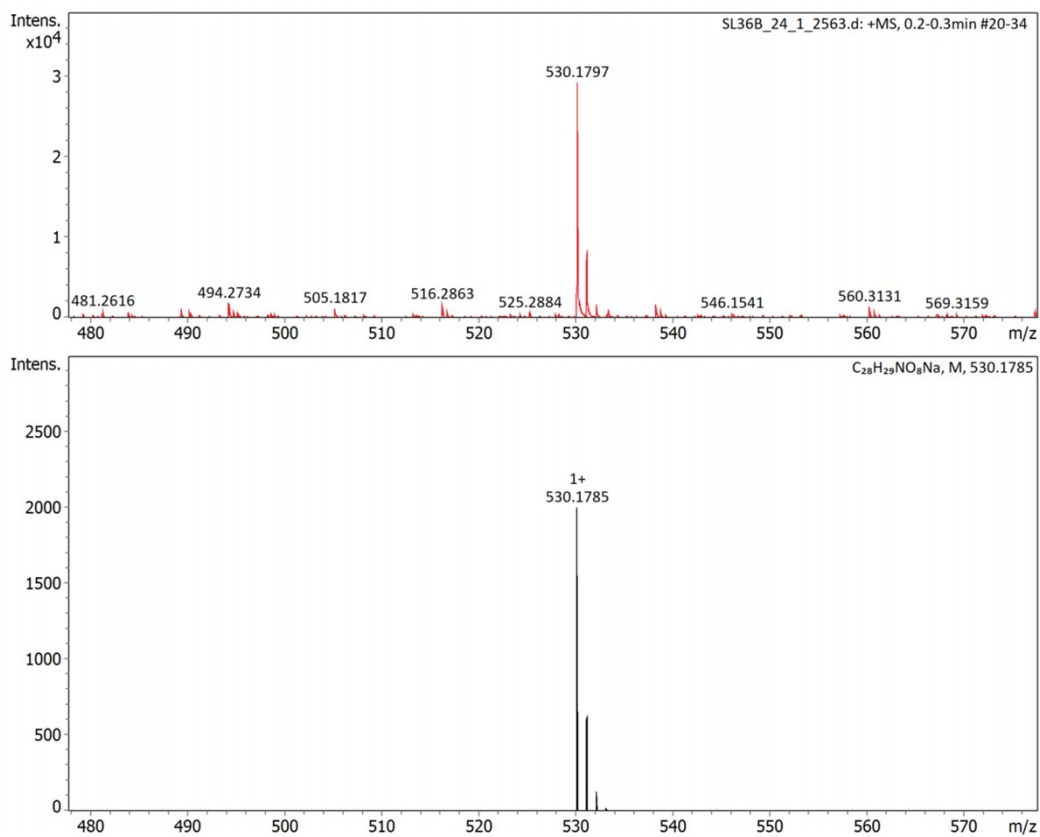

**Fig. S48.** The HRESIMS spectrum of compound **7**

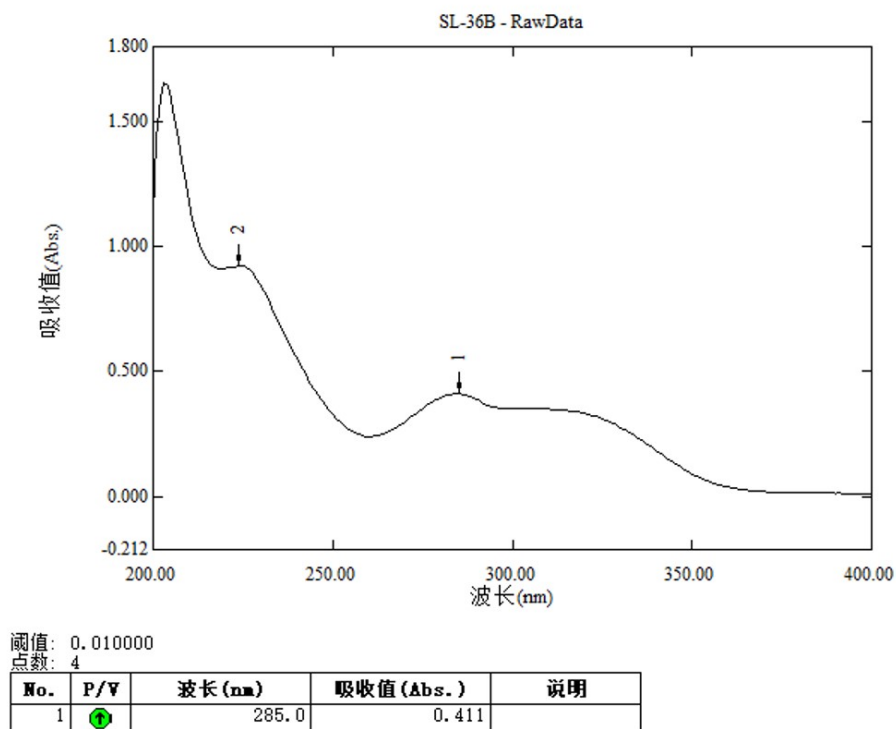

**Fig. S49.** The UV spectrum of compound 7

**Table S1.** Inhibitory activities of AChE by compounds from *S. lyratum*

| Compound  | IC <sub>50</sub> for AChE (μmol/L) <sup>a</sup> |
|-----------|-------------------------------------------------|
| <b>2a</b> | 3.55±1.72                                       |
| <b>6a</b> | 8.62±4.98                                       |
| Donepezil | 3.12±0.006                                      |

<sup>a</sup>Results represent means±SD ( $n=3$ ) and all values are significantly different ( $P<0.05$ ).
